# Supplementary material for: Oxidative homodimerization of substituted olefins by DDQ visible light photocatalysis
Source: Royal Society of Chemistry journal article supplement (doi:10.1039/c8qo00792f), 2018-01-01
Supplement: c8qo00792f1.pdf [file c8qo00792f1.pdf]

## Supplementary Information

### Oxidative homodimerization of substituted olefins by DDQ visible light photocatalysis

Deachen Chuskit,<sup>a</sup> Renu Chaudhary,<sup>a</sup> Paloth Venugopalan,<sup>a</sup> Burkhard König\*<sup>b</sup> and Palani Natarajan\*<sup>a</sup>

<sup>a</sup> *Department of Chemistry & Centre for Advanced Studies in Chemistry, Panjab University, Chandigarh - 160 014, India.*

<sup>b</sup> *Fakultat für Chemie und Pharmazie, Universität Regensburg, 93040 Regensburg, Germany.*

[burkhard.koenig@ur.de](mailto:burkhard.koenig@ur.de) and [pnataraj@pu.ac.in](mailto:pnataraj@pu.ac.in)

---

#### Table of Contents:

|                                                                         |         |
|-------------------------------------------------------------------------|---------|
| 1. General aspects                                                      | S2      |
| 2. General procedure for the synthesis of buta-1,3-dienes               | S2      |
| 3. Experimental characterization data for products                      | S3-S9   |
| 4. X-ray data for compound <b>2a</b>                                    | S10-S15 |
| 5. References                                                           | S15     |
| 6. Copies of <sup>1</sup> H and <sup>13</sup> C NMR spectra of products | S16-S36 |

## Experimental Section

### General Aspects

Unless otherwise noted, all the reactions were performed at 30 °C. All commercial chemicals, reagents and precursors were used as received. All reactions were carried out under nitrogen gas atmosphere. All solvents were dried over 4Å molecular sieves and distilled prior to use. Reactions were monitored by analytical thin layer chromatography on silica gel and visualization was accomplished by irradiation with short wave UV light at 254 nm and near UV 366 nm lights. Column chromatography was carried out on silica gel using 60-120 mesh powder. All NMR spectra were recorded on a Bruker Avance (300 MHz) spectrometer in deuterated solvents such as CD<sub>2</sub>Cl<sub>2</sub>, CD<sub>3</sub>CN or DMSO-d<sub>6</sub>. Chemical shifts are expressed in parts per million (ppm) and were calibrated using the residual protonated solvent peak. High resolution mass spectra were collected on Waters-Q-TOF-Premier. IR spectra were recorded on a Perkin Elmer Spectrum 1000 FT-IR spectrometer. Photochemical reactions were performed with 455 nm (OSRAM Oslon SSL 80 royal-blue LEDs ( $\lambda = 455 \text{ nm} (\pm 15 \text{ nm})$ ), 3.5 V, 700 mA).

### General procedure for the synthesis of substituted buta-1,4-dienes

A crimp vial equipped with a magnetic stir bar was charged with DDQ (0.2 mmol, 20 mol%) and ClCH<sub>2</sub>CH<sub>2</sub>Cl. To this solution, the olefins (1.0 mmol), and TBN (1.0 mmol) were added. The vial was sealed with a rubber cork and inlet/outlet for N<sub>2</sub> gas was provided by needles. The mixture was stirred few minutes to mix well and then the vial was irradiated through the plane bottom side of the crimp vial using a 5W 455 nm LED at a distance of 2 cm. After stirring at 30 °C for 12-15 h, the solvent was removed under reduced pressure to get the crude product that was purified by column chromatography using hexane-ethyl acetate-CHCl<sub>3</sub> mixtures as an eluent. The purity of the compound was confirmed by IR, <sup>1</sup>H and <sup>13</sup>C NMR and HRMS measurements, *vide infra*.

## Experimental characterization data for products

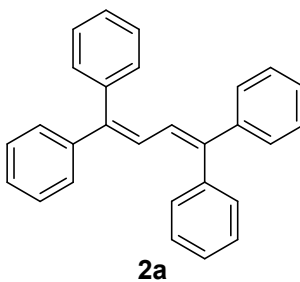

**1,1,4,4-tetraphenylbuta-1,3-diene (2a)**<sup>1</sup>: 308 mg, 86% yield;  $R_f$  0.31 in pet. ether; IR (KBr,  $\text{cm}^{-1}$ ):  $\nu$  3054, 2923, 2852, 1484, 1449, 756;  $^1\text{H}$  NMR ( $\text{CD}_2\text{Cl}_2$ , 300 MHz)  $\delta$  7.47-7.37 (m, 6H), 7.34-7.29 (m, 4H), 7.26-7.19 (m, 6H), 7.18-7.11 (m, 4H), 6.76 (s, 2H);  $^{13}\text{C}$  NMR ( $\text{CD}_2\text{Cl}_2$ , 75 MHz)  $\delta$  144.5, 142.9, 140.3, 131.1, 128.7, 128.5, 128.0, 127.9, 127.8, 126.4. HRMS (EI)  $m/z$  calcd for  $\text{C}_{28}\text{H}_{22}$ : 358.1722, found: 358.1726.

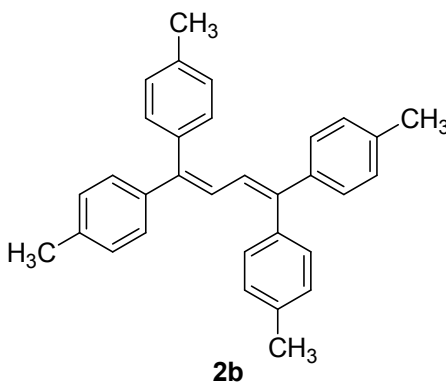

**1,1,4,4-tetra-*p*-tolylbuta-1,3-diene (2b)**: 356 mg, 86% yield;  $R_f$  0.28 in pet. ether; IR (KBr,  $\text{cm}^{-1}$ ):  $\nu$  3073, 3064, 1481, 1316, 733, 689;  $^1\text{H}$  NMR ( $\text{DMSO-d}_6$ , 300 MHz)  $\delta$  7.32 (d,  $J = 8.2$  Hz, 4H), 7.29-7.18 (m, 8H), 7.12 (d,  $J = 8.2$  Hz, 4H), 6.76 (s, 2H), 2.33 (s, 6H), 2.32 (s, 6H);  $^{13}\text{C}$  NMR ( $\text{DMSO-d}_6$ , 75 MHz)  $\delta$  144.5, 141.3, 139.1, 136.8, 136.7, 130.6, 129.2, 128.9, 127.7, 126.1, 21.0, 20.9. HRMS (EI)  $m/z$  calcd for  $\text{C}_{32}\text{H}_{30}$ : 414.2348, found: 414.2346.

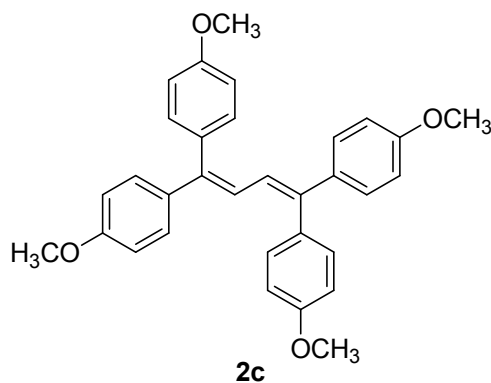

**1,1,4,4-tetrakis(4-methoxyphenyl)buta-1,3-diene (2c)**<sup>2</sup>: 430 mg, 90% yield;  $R_f$  0.30 in  $\text{CHCl}_3$ -pet. ether (20:80); IR (KBr,  $\text{cm}^{-1}$ ):  $\nu$  2926, 2856, 1451, 1433, 833;  $^1\text{H}$  NMR (DMSO- $d_6$ , 300 MHz)  $\delta$  7.29 (d,  $J = 9.4$  Hz, 4H), 7.13 (d,  $J = 8.6$  Hz, 4H), 6.96 (d,  $J = 8.6$  Hz, 4H), 6.81 (d,  $J = 9.4$  Hz, 4H), 6.67 (s, 2H), 3.86 (s, 6H), 3.81 (s, 6H);  $^{13}\text{C}$  NMR (DMSO- $d_6$ , 75 MHz)  $\delta$  158.9, 158.5, 142.0, 135.6, 132.4, 131.8, 128.7, 124.7, 113.4, 113.3, 55.38, 55.36. HRMS (EI)  $m/z$  calcd for  $\text{C}_{32}\text{H}_{30}\text{O}_4$ : 478.2144, found: 478.2143.

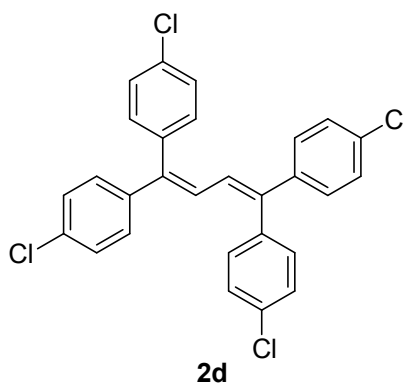

**1,1,4,4-tetrakis(4-chlorophenyl)buta-1,3-diene (2d)**: 366 mg, 74% yield,  $R_f$  0.80 in  $\text{CHCl}_3$ -pet. ether (20:80); IR (KBr,  $\text{cm}^{-1}$ ):  $\nu$  2922, 2853, 2384, 1453, 1432, 836;  $^1\text{H}$  NMR (DMSO- $d_6$ , 300 MHz)  $\delta$  7.34 (d,  $J = 8.8$  Hz, 4H), 7.27-7.20 (m, 8H), 7.18 (d,  $J = 8.8$  Hz, 4H), 6.69 (s, 2H);  $^{13}\text{C}$  NMR (DMSO- $d_6$ , 75 MHz)  $\delta$  144.4, 140.6, 137.7, 135.9, 135.6, 132.4, 130.2, 128.8, 128.6, 126.3. HRMS (EI)  $m/z$  calcd for  $\text{C}_{28}\text{H}_{18}\text{Cl}_4$ : 494.0163, found: 494.0167.

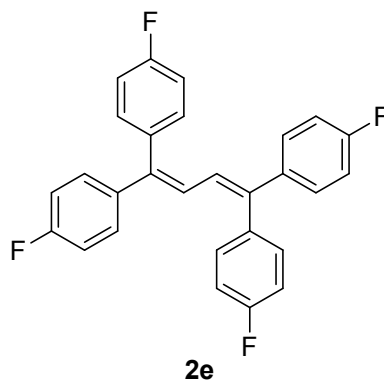

**1,1,4,4-tetrakis(4-fluorophenyl)buta-1,3-diene (2e)**<sup>3</sup>: 285 mg, 66% yield;  $R_f$  0.81 in  $\text{CHCl}_3$ -pet. ether (20:80); IR (KBr,  $\text{cm}^{-1}$ ):  $\nu$  3044, 2932, 2854, 1458, 753;  $^1\text{H}$  NMR (DMSO- $d_6$ , 300 MHz)  $\delta$  7.31-7.27 (m, 4H), 7.19-7.11 (m, 8H), 7.03-6.97 (m, 4H), 6.64 (s, 2H);  $^{13}\text{C}$  NMR (DMSO- $d_6$ , 75 MHz)  $\delta$  162.5 (d,  $J = 246$  Hz), 162.2 (d,  $J = 246$  Hz), 142.4, 138.5 (d,  $J = 4$  Hz), 135.6 (d,  $J = 4$  Hz), 132.1 (d,  $J = 8$  Hz), 129.5 (d,  $J = 8$  Hz), 125.8, 115.6 (d,  $J = 22$  Hz), 115.1 (d,  $J = 22$  Hz). HRMS (EI)  $m/z$  calcd for  $\text{C}_{28}\text{H}_{18}\text{F}_4$ : 430.1345, found: 430.1347.

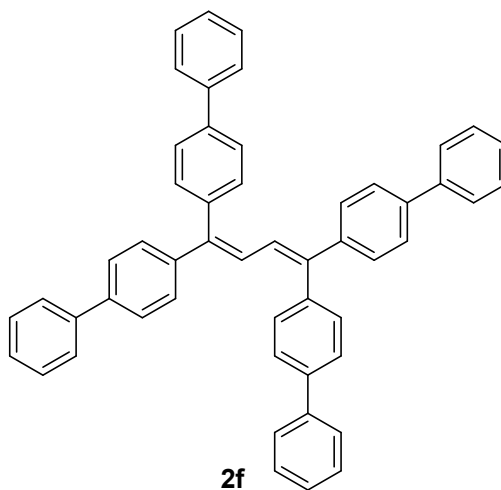

**1,1,4,4-tetrakis([1,1'-biphenyl]-4-yl)buta-1,3-diene (2f)**: 510 mg, 77% yield;  $R_f$  0.71 in  $\text{CHCl}_3$ -pet. ether (20:80); IR (KBr,  $\text{cm}^{-1}$ ):  $\nu$  3046, 2927, 2855, 1457, 759;  $^1\text{H}$  NMR (DMSO- $d_6$ , 300 MHz)  $\delta$  7.55 (d,  $J = 8.2$  Hz, 4H), 7.48-7.41 (m, 16H), 7.39-7.32 (m, 12H), 7.28-7.24 (d,  $J = 8.4$  Hz, 4H), 6.75 (s, 2H). Anal. calcd for  $\text{C}_{52}\text{H}_{38}$ : C, 94.22; H, 5.78; found: C, 94.19; H, 5.76. In common organic solvents **2f** was sparingly soluble that precluded collection of  $^{13}\text{C}$  NMR spectra.

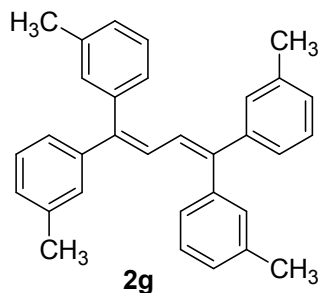

**1,1,4,4-tetra-*m*-tolylbuta-1,3-diene (2g)**: 369 mg, 89% yield;  $R_f$  0.24 in pet. ether; IR (KBr,  $\text{cm}^{-1}$ ):  $\nu$  3053, 2928, 2854, 1457, 1082, 835;  $^1\text{H}$  NMR (DMSO- $d_6$ , 300 MHz)  $\delta$  7.48-7.44 (m, 4H), 7.31-7.20 (m, 8H), 7.11-7.02 (m, 4H), 6.78 (s, 2H), 1.57 (s, 6H), 1.56 (s, 6H);  $^{13}\text{C}$  NMR (DMSO- $d_6$ , 75 MHz)  $\delta$  144.1, 143.0, 140.6, 139.6, 138.2, 130.7, 130.3, 129.0, 128.2, 128.1, 127.2, 126.3, 126.1, 125.6, 21.4, 21.3. HRMS (EI)  $m/z$  calcd for  $\text{C}_{32}\text{H}_{30}$ : 414.2348, found: 414.2344.

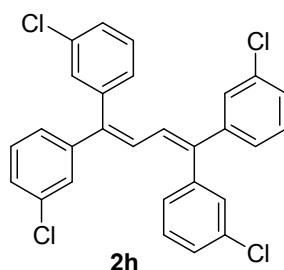

**1,1,4,4-tetrakis(3-chlorophenyl)buta-1,3-diene (2h)**: 356 mg, 72% yield;  $R_f$  0.26 in pet. ether; IR (KBr,  $\text{cm}^{-1}$ ):  $\nu$  2926, 2856, 1455, 1429, 1074, 1025, 968;  $^1\text{H}$  NMR (DMSO- $d_6$ , 300 MHz)  $\delta$  7.37 (d,  $J = 8.8$  Hz, 2H), 7.31-7.27 (m, 4H), 7.25-7.21 (m, 2H), 7.19-7.13 (m, 8H), 6.76 (s, 2H);  $^{13}\text{C}$  NMR (DMSO- $d_6$ , 75 MHz)  $\delta$  144.2, 143.1, 140.7, 134.2, 134.1, 132.1, 130.7, 129.2, 128.7, 128.6, 127.1, 126.3, 126.2. HRMS (EI)  $m/z$  calcd for  $\text{C}_{28}\text{H}_{18}\text{Cl}_4$ : 494.0163, found: 494.0167.

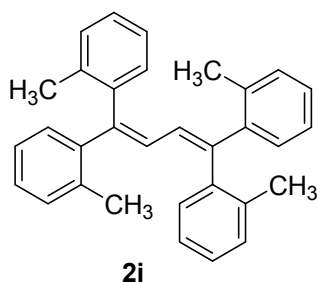

**1,1,4,4-tetra-*o*-tolylbuta-1,3-diene (2i)**: 365 mg, 88% yield;  $R_f$  0.24 in pet. ether; IR (KBr,  $\text{cm}^{-1}$ ):  $\nu$  2926, 2855, 1476, 1458, 1076, 829, 757;  $^1\text{H}$  NMR (DMSO- $d_6$ , 300 MHz)  $\delta$  7.46 (d,  $J = 7.4$  Hz, 2H), 7.23-7.14 (m, 12H), 7.06 (d,  $J = 7.4$  Hz, 2H), 6.77 (s, 2H);  $^{13}\text{C}$  NMR (DMSO- $d_6$ , 75 MHz)  $\delta$  149.7, 148.2, 144.1, 136.6, 135.3, 130.2, 129.6, 129.3, 128.8, 127.7, 127.6, 126.4, 125.9, 20.0, 19.9. HRMS (EI)  $m/z$  calcd for  $\text{C}_{32}\text{H}_{30}$ : 414.2348, found: 414.2347.

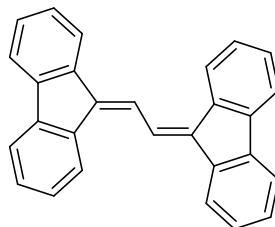

**2j**

**1,2-di(9H-fluoren-9-ylidene)ethane (2j):** 308 mg, 87% yield;  $R_f$  0.64 in  $\text{CHCl}_3$ -pet. ether (20:80); IR (KBr,  $\text{cm}^{-1}$ ):  $\nu$  2932, 2856, 1458, 1079, 832;  $^1\text{H}$  NMR (DMSO- $d_6$ , 300 MHz)  $\delta$  8.06-7.89 (m, 4H), 7.44-7.26 (m, 12H), 6.64 (s, 2H). Anal. calcd. for  $\text{C}_{28}\text{H}_{18}$ : C, 94.88; H, 5.12; found: C, 94.82; H, 5.16. In common organic solvents **2j** was sparingly soluble that precluded collection of  $^{13}\text{C}$  NMR spectra.

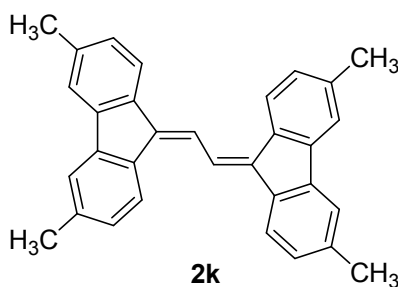

**2k**

**1,2-bis(3,6-dimethyl-9H-fluoren-9-ylidene)ethane (2k):** 353 mg, 86% yield;  $R_f$  0.59 in  $\text{CHCl}_3$ -pet. ether (20:80); IR (KBr,  $\text{cm}^{-1}$ ):  $\nu$  3053, 2935, 2854, 1455, 1076, 839, 754;  $^1\text{H}$  NMR (DMSO- $d_6$ , 300 MHz)  $\delta$  7.71 (s, 2H), 7.53 (s, 2H), 7.32-7.15 (m, 6H), 7.03-6.99 (m, 2H), 6.68 (s, 2H), 2.34 (s, 6H), 2.33 (s, 6H);  $^{13}\text{C}$  NMR (DMSO- $d_6$ , 75 MHz)  $\delta$  142.8, 142.1, 141.2, 140.2, 139.3, 138.6, 137.4, 136.4, 135.6, 128.3, 127.8, 127.2, 126.8, 126.2, 21.2, 21.1. HRMS (EI)  $m/z$  calcd for  $\text{C}_{32}\text{H}_{26}$ : 410.2035, found: 410.2039.

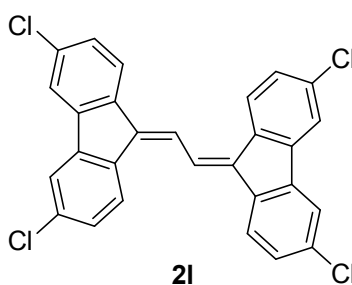

**2l**

**1,2-bis(3,6-dichloro-9H-fluoren-9-ylidene)ethane (2l):** 353 mg, 72% yield;  $R_f$  0.60 in  $\text{CHCl}_3$ -pet. ether (20:80); IR (KBr,  $\text{cm}^{-1}$ ):  $\nu$  3072, 2967, 2856, 1441, 1377, 1131, 721;  $^1\text{H}$  NMR (DMSO- $d_6$ , 300 MHz)  $\delta$  7.85 (s, 2H), 7.67 (s, 2H), 7.40-7.28 (m, 8H), 6.71 (s, 2H). Anal. calcd. for  $\text{C}_{28}\text{H}_{14}\text{Cl}_4$ : C, 68.32; H, 2.87; found: C, 68.29; H, 2.91. In common organic solvents **2l** was sparingly soluble that precluded collection of  $^{13}\text{C}$  NMR spectra.

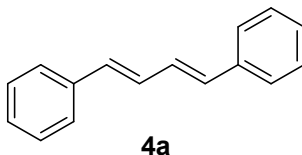

**(1E,3E)-1,4-diphenylbuta-1,3-diene (4a)**<sup>4</sup>: 118 mg, 57% yield;  $R_f$  0.53 in pet. ether; IR (KBr,  $\text{cm}^{-1}$ ):  $\nu$  3066, 2939, 1464, 1349, 1108, 757;  $^1\text{H}$  NMR (DMSO- $d_6$ , 300 MHz)  $\delta$  7.47-7.43 (m, 4H), 7.36-7.29 (m, 4H), 7.26-7.21 (m, 2H), 6.98 (AA' of AA'BB' pattern, 2H), 6.67 (BB' of AA'BB' pattern, 2H);  $^{13}\text{C}$  NMR (DMSO- $d_6$ , 75 MHz)  $\delta$  137.4, 132.9, 129.4, 128.6, 127.7, 126.4. HRMS (EI)  $m/z$  calcd for  $\text{C}_{16}\text{H}_{14}$ : 206.1096, found: 206.1092.

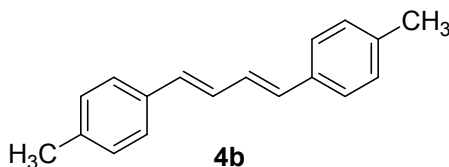

**(1E,3E)-1,4-di-p-tolylbuta-1,3-diene (4b)**<sup>5</sup>: 139 mg, 59% yield;  $R_f$  0.49 in pet. ether; IR (KBr,  $\text{cm}^{-1}$ ):  $\nu$  3064, 3035, 2997, 1458, 1374, 1313, 1168, 759;  $^1\text{H}$  NMR (DMSO- $d_6$ , 300 MHz)  $\delta$  7.36 (d,  $J = 8.4$  Hz, 4H), 7.16 (d,  $J = 8.4$  Hz, 4H), 6.91 (AA' of AA'BB' pattern, 2H), 6.65 (BB' of AA'BB' pattern, 2H), 2.37(s, 6H);  $^{13}\text{C}$  NMR (DMSO- $d_6$ , 75 MHz)  $\delta$  137.4, 134.7, 132.3, 129.2, 128.6, 126.3, 21.2. HRMS (EI)  $m/z$  calcd for  $\text{C}_{18}\text{H}_{18}$ : 234.1409, found: 234.1406.

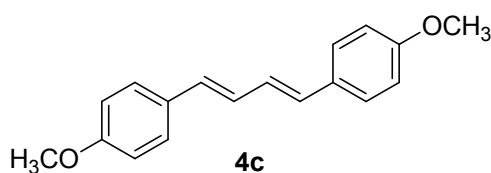

**(1E,3E)-1,4-bis(4-methoxyphenyl)buta-1,3-diene (4c)**<sup>5</sup>: 136 mg, 51% yield;  $R_f$  0.36 in pet. ether; IR (KBr,  $\text{cm}^{-1}$ ):  $\nu$  2957, 2925, 2856, 1468, 797, 614;  $^1\text{H}$  NMR (DMSO- $d_6$ , 300 MHz)  $\delta$  7.41-7.34 (m, 4H), 6.89-6.83 (m, 4H), 6.82 (AA' of AA'BB' pattern, 2H), 6.58 (BB' of AA'BB' pattern, 2H), 3.83 (s, 6H);  $^{13}\text{C}$  NMR (DMSO- $d_6$ , 75 MHz)  $\delta$  159.1, 131.4, 130.4, 127.5, 127.4, 114.1, 55.3. HRMS (EI)  $m/z$  calcd for  $\text{C}_{18}\text{H}_{18}\text{O}_2$ : 266.1307, found: 266.1309.

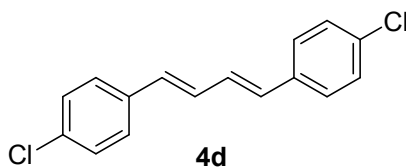

**(1E,3E)-1,4-bis(4-chlorophenyl)buta-1,3-diene (4d)**<sup>6</sup>: 135 mg, 49% yield;  $R_f$  0.50 in pet. ether; IR (KBr,  $\text{cm}^{-1}$ ):  $\nu$  3037, 2994, 2967, 1457, 1433, 1377, 1167, 731, 648;  $^1\text{H}$  NMR (DMSO- $d_6$ , 300 MHz)  $\delta$  7.36 (d,  $J = 7.8$  Hz, 4H) 7.31 (d,  $J = 7.8$  Hz, 4H) 6.93 (AA' of AA'BB' pattern, 2H), 6.63 (BB' of AA'BB' pattern, 2H);  $^{13}\text{C}$  NMR (DMSO- $d_6$ , 75 MHz)  $\delta$  135.8, 133.4, 132.0, 130.1, 128.9, 127.7. HRMS (EI)  $m/z$  calcd for  $\text{C}_{16}\text{H}_{12}\text{Cl}_2$ : 274.0316, found: 274.0318.



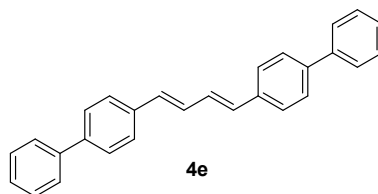

**(1E,3E)-1,4-di([1,1'-biphenyl]-4-yl)buta-1,3-diene (4e)**<sup>7</sup>: 240 mg, 67% yield;  $R_f$  0.45 in pet. ether; IR (KBr,  $\text{cm}^{-1}$ ):  $\nu$  3080, 3067, 1464, 1448, 1433, 786, 734, 689;  $^1\text{H}$  NMR (DMSO- $d_6$ , 300 MHz)  $\delta$  7.59-7.55 (m, 4H), 7.51-7.40 (m, 10H) 7.39-7.30 (m, 4H) 6.76 (AA' of AA'BB' pattern, 2H), 5.81 (BB' of AA'BB' pattern, 2H);  $^{13}\text{C}$  NMR (DMSO- $d_6$ , 75 MHz)  $\delta$  141.1, 140.9, 136.9, 133.1, 129.7, 129.1, 128.7, 127.9, 127.7, 126.9. HRMS (EI)  $m/z$  calcd for  $\text{C}_{28}\text{H}_{22}$ : 358.1722, found: 358.1727.

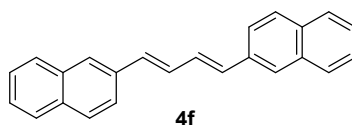

**(1E,3E)-1,4-di(naphthalen-2-yl)buta-1,3-diene (4f)**<sup>5</sup>: 211 mg, 61% yield;  $R_f$  0.41 in pet. ether; IR (KBr,  $\text{cm}^{-1}$ ):  $\nu$  3084, 3068, 1466, 1454, 1431, 786, 735, 686;  $^1\text{H}$  NMR (DMSO- $d_6$ , 300 MHz)  $\delta$  7.86-7.80 (m, 8H), 7.71 (d,  $J = 8.8$  Hz, 2H), 7.50-7.43 (m, 4H), 7.20 (AA' of AA'BB', 2H), 6.91 (BB' of AA'BB', 2H). Anal. calcd. for  $\text{C}_{24}\text{H}_{18}$ : C, 94.08; H, 5.92; found: C, 94.06; H, 5.87. In common organic solvents **4f** was sparingly soluble that precluded collection of  $^{13}\text{C}$  NMR spectra.

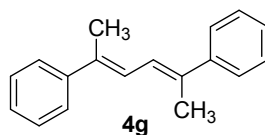

**(2E,4E)-hexa-2,4-diene-2,5-diyl dibenzene (4g)**: 165 mg, 70% yield;  $R_f$  0.49 in pet. ether; IR (KBr,  $\text{cm}^{-1}$ ):  $\nu$  3045, 2932, 2854, 1454, 1072, 827, 749;  $^1\text{H}$  NMR (DMSO- $d_6$ , 300 MHz)  $\delta$  7.38-7.35 (m, 10H), 6.72 (s, 2H), 2.22 (s, 6H);  $^{13}\text{C}$  NMR (DMSO- $d_6$ , 75 MHz)  $\delta$  141.1, 133.2, 129.5, 128.6, 127.8, 126.3, 21.8. HRMS (EI)  $m/z$  calcd for  $\text{C}_{18}\text{H}_{18}$ : 234.1409, found: 234.1408.

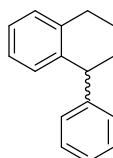

**1-phenyl-1,2,3,4-tetrahydronaphthalene (5)**:  $R_f$  0.61 in pet. ether; IR (KBr,  $\text{cm}^{-1}$ ):  $\nu$  3042, 2936, 2855, 829, 751;  $^1\text{H}$  NMR (DMSO- $d_6$ , 300 MHz)  $\delta$  7.31-6.98 (m, 9H), 4.12 (t,  $J = 6.2$  Hz, 1H), 2.91-2.83 (m, 2H), 2.22-2.13 (m, 1H), 1.93-1.71 (m, 3H);  $^{13}\text{C}$  NMR (DMSO- $d_6$ , 75 MHz)  $\delta$  147.5, 139.4, 137.7, 130.3, 129.0, 128.8, 128.3, 125.9, 125.5, 45.6, 33.4, 29.8, 21.1. HRMS (EI)  $m/z$  calcd for  $\text{C}_{16}\text{H}_{16}$ : 208.1252, found: 208.1257.

## Crystal Data of compound 2a

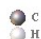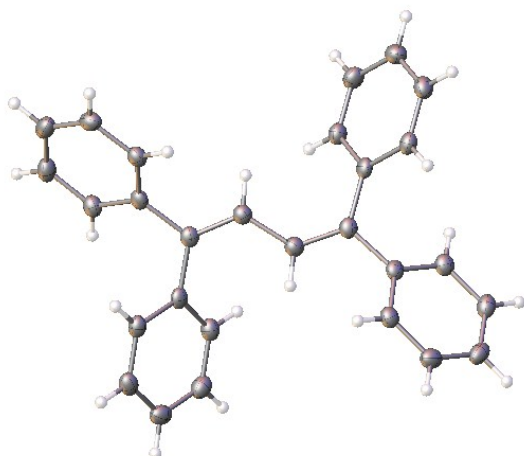

**Experimental.** Single clear colourless plate-shaped crystals of (**Q119**) were obtained by recrystallisation from .... A suitable crystal (0.21×0.17×0.09) mm<sup>3</sup> was selected and mounted on a MITIGEN holder oil on a SuperNova, Single source at offset, Atlas diffractometer. The crystal was kept at  $T = 122.98(13)$  K during data collection. Using **Olex2** (Dolomanov et al., 2009), the structure was solved with the **ShelXT** (Sheldrick, 2015) structure solution program, using the Intrinsic Phasing solution method. The model was refined with version 2016/6 of **ShelXL** (Sheldrick, 2015) using Least Squares minimisation.

**Crystal Data.** C<sub>28</sub>H<sub>22</sub>,  $M_r = 358.45$ , triclinic, P-1 (No. 2),  $a = 9.7638(5)$  Å,  $b = 10.0633(5)$  Å,  $c = 10.6246(5)$  Å,  $\alpha = 100.341(4)^\circ$ ,  $\beta = 103.170(4)^\circ$ ,  $\gamma = 95.285(4)^\circ$ ,  $V = 990.28(9)$  Å<sup>3</sup>,  $T = 122.98(13)$  K,  $Z = 2$ ,  $Z' = 1$ ,  $\mu(\text{CuK}\alpha) = 0.511$ , 21623 reflections measured, 3440 unique ( $R_{int} = 0.0470$ ) which were used in all calculations. The final  $wR_2$  was 0.0934 (all data) and  $R_1$  was 0.0358 ( $I > 2(I)$ ).

| Compound                     | Q119                            |
|------------------------------|---------------------------------|
| Formula                      | C <sub>28</sub> H <sub>22</sub> |
| $D_{calc.}/\text{g cm}^{-3}$ | 1.202                           |
| $\mu/\text{mm}^{-1}$         | 0.511                           |
| Formula Weight               | 358.45                          |
| Colour                       | clear colourless                |
| Shape                        | plate                           |
| Size/mm <sup>3</sup>         | 0.21×0.17×0.09                  |
| $T/\text{K}$                 | 122.98(13)                      |
| Crystal System               | triclinic                       |
| Space Group                  | P-1                             |
| $a/\text{Å}$                 | 9.7638(5)                       |
| $b/\text{Å}$                 | 10.0633(5)                      |
| $c/\text{Å}$                 | 10.6246(5)                      |
| $\alpha^\circ$               | 100.341(4)                      |
| $\beta^\circ$                | 103.170(4)                      |
| $\gamma^\circ$               | 95.285(4)                       |
| $V/\text{Å}^3$               | 990.28(9)                       |
| $Z$                          | 2                               |
| $Z'$                         | 1                               |
| Wavelength/Å                 | 1.54184                         |
| Radiation type               | CuK $\alpha$                    |
| $\theta_{min}/^\circ$        | 4.368                           |
| $\theta_{max}/^\circ$        | 66.631                          |
| Measured Refl.               | 21623                           |
| Independent Refl.            | 3440                            |
| Reflections Used             | 2950                            |
| $R_{int}$                    | 0.0470                          |
| Parameters                   | 253                             |
| Restraints                   | 0                               |
| Largest Peak                 | 0.148                           |
| Deepest Hole                 | -0.223                          |
| GooF                         | 1.036                           |
| $wR_2$ (all data)            | 0.0934                          |
| $wR_2$                       | 0.0881                          |
| $R_1$ (all data)             | 0.0434                          |
| $R_1$                        | 0.0358                          |

## Structure Quality Indicators

|                     |                        |                        |                      |                                            |
|---------------------|------------------------|------------------------|----------------------|--------------------------------------------|
| <b>Reflections:</b> | d min (Cu) <b>0.84</b> | $I/\sigma$ <b>22.3</b> | Rint <b>4.70%</b>    | complete at $2\theta=125^\circ$ <b>98%</b> |
| <b>Refinement:</b>  | Shift <b>0.000</b>     | Max Peak <b>0.1</b>    | Min Peak <b>-0.2</b> | Goof <b>1.036</b>                          |

A clear colourless plate-shaped crystal with dimensions  $0.21 \times 0.17 \times 0.09$  mm<sup>3</sup> was mounted on a MITIGEN holder oil. X-ray diffraction data were collected using a SuperNova, Single source at offset, Atlas diffractometer equipped with a n/a low-temperature device, operating at  $T = 122.98(13)$  K.

Data were measured using  $\omega$  scans scans of  $1.0^\circ$  per frame for 1.0 s using CuK $_{\alpha}$  radiation (micro-focus sealed X-ray tube, n/a kV, n/a mA). The total number of runs and images was based on the strategy calculation from the program CrysAlisPro (Agilent). The maximum resolution achieved was  $\theta = 66.631$ .&nbsp;°

Cell parameters were retrieved using the CrysAlisPro (Agilent) software and refined using CrysAlisPro (Agilent) on 9100 reflections, 42 % of the observed reflections. Data reduction was performed using the CrysAlisPro (Agilent) software which corrects for Lorentz polarisation. The final completeness is 98.50 out to 66.631 in  $\theta$ . The absorption coefficient  $\mu$  of this material is 0.511 at this wavelength ( $\lambda = 1.54184$ ) and the minimum and maximum transmissions are 0.958 and 0.983.

The structure was solved in the space group P-1 (# 2) by Intrinsic Phasing using the **ShelXT** (Sheldrick, 2015) structure solution program and refined by Least Squares using version 2016/6 of **ShelXL** (Sheldrick, 2015). All non-hydrogen atoms were refined anisotropically. Hydrogen atom positions were calculated geometrically and refined using the riding model.

*\_refine\_special\_details:* ?

*\_exptl\_absorpt\_special\_details:* ?

There is a single molecule in the asymmetric unit, which is represented by the reported sum formula. In other words: Z is 2 and Z' is 1.

## Data Plots: Diffraction Data

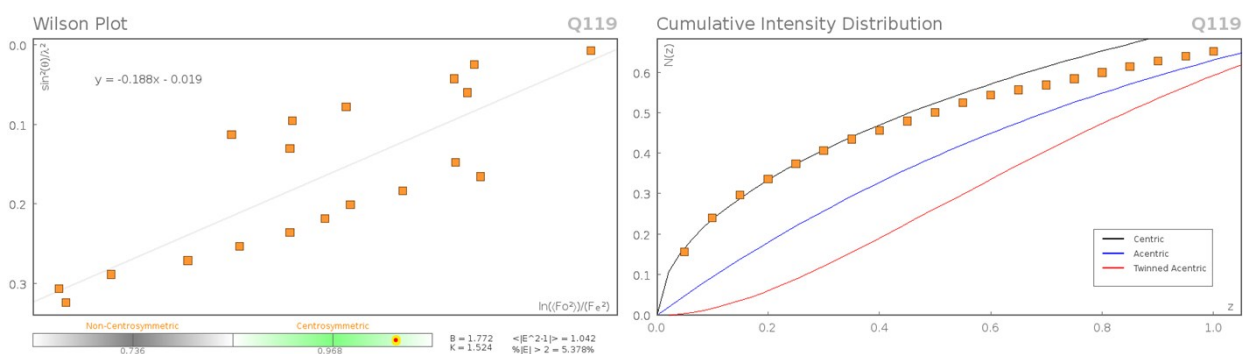

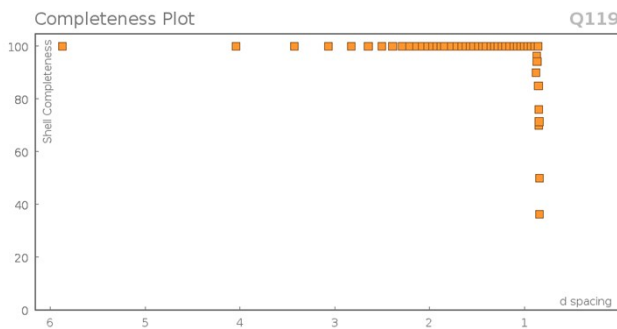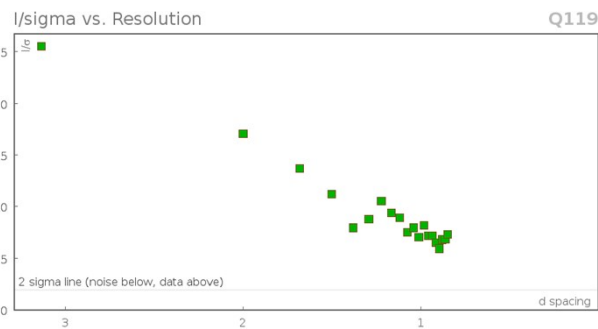

## Data Plots: Refinement and Data

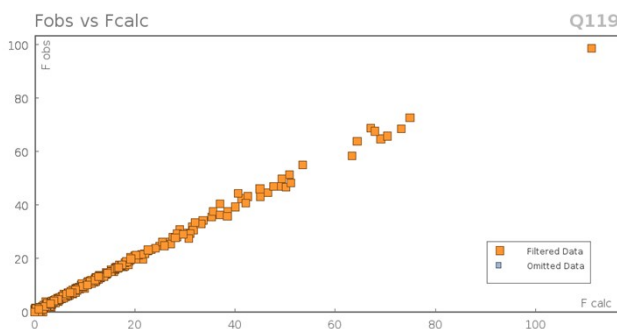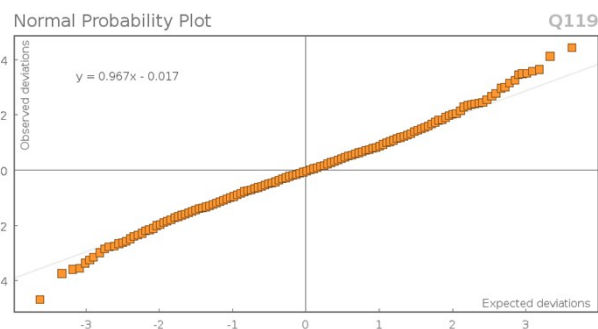

## Reflection Statistics

|                                     |                                                       |                            |                 |
|-------------------------------------|-------------------------------------------------------|----------------------------|-----------------|
| Total reflections (after filtering) | 21623                                                 | Unique reflections         | 3440            |
| Completeness                        | 0.985                                                 | Mean $I/\sigma$            | 22.28           |
| $hkl_{\max}$ collected              | (11, 11, 12)                                          | $hkl_{\min}$ collected     | (-11, -11, -12) |
| $hkl_{\max}$ used                   | (11, 11, 12)                                          | $hkl_{\min}$ used          | (-11, -11, 0)   |
| Lim $d_{\max}$ collected            | 100.0                                                 | Lim $d_{\min}$ collected   | 0.77            |
| $d_{\max}$ used                     | 10.12                                                 | $d_{\min}$ used            | 0.84            |
| Friedel pairs                       | 3194                                                  | Friedel pairs merged       | 1               |
| Inconsistent equivalents            | 7                                                     | $R_{\text{int}}$           | 0.047           |
| $R_{\text{sigma}}$                  | 0.0261                                                | Intensity transformed      | 0               |
| Omitted reflections                 | 0                                                     | Omitted by user (OMIT hkl) | 0               |
| Multiplicity                        | (1228, 1449, 1285, 1061, 756, 500, 245, 93, 12, 4, 1) | Maximum multiplicity       | 19              |
| Removed systematic absences         | 0                                                     | Filtered off (Shel/OMIT)   | 0               |

## Images of the Crystal on the Diffractometer

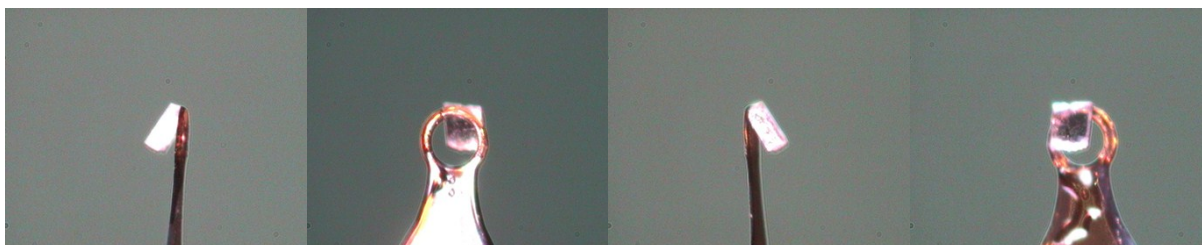

**Table 1:** Fractional Atomic Coordinates ( $\times 10^4$ ) and Equivalent Isotropic Displacement Parameters ( $\text{\AA}^2 \times 10^3$ ) for **Q119**.  $U_{eq}$  is defined as  $1/3$  of the trace of the orthogonalised  $U_{ij}$ .

| Atom  | x          | y          | z           | $U_{eq}$ |
|-------|------------|------------|-------------|----------|
| C(17) | 3313.0(13) | 3322.8(12) | 8409.8(11)  | 22.1(3)  |
| C(7)  | 5013.9(13) | 6406.5(12) | 6577.2(11)  | 22.0(3)  |
| C(2)  | 6541.3(13) | 6884.0(12) | 6733.8(11)  | 21.6(3)  |
| C(8)  | 3954.6(13) | 7190.0(12) | 5901.2(11)  | 22.1(3)  |
| C(16) | 4781.7(12) | 3409.6(12) | 8223.5(11)  | 21.9(3)  |
| C(18) | 2734.3(13) | 4481.6(13) | 8861.2(11)  | 24.8(3)  |
| C(9)  | 4238.6(13) | 8605.2(13) | 6073.9(11)  | 25.2(3)  |
| C(23) | 5667.9(12) | 2386.2(12) | 8694.3(11)  | 21.9(3)  |
| C(22) | 2464.3(13) | 2056.7(13) | 8127.7(11)  | 24.3(3)  |
| C(3)  | 6996.6(13) | 7258.8(12) | 5671.1(11)  | 23.8(3)  |
| C(24) | 6529.3(13) | 1765.9(13) | 7948.4(12)  | 24.7(3)  |
| C(15) | 5321.4(13) | 4367.2(12) | 7643.8(11)  | 23.0(3)  |
| C(21) | 1075.6(13) | 1959.9(14) | 8243.1(12)  | 28.1(3)  |
| C(19) | 1347.1(14) | 4381.9(14) | 8973.4(12)  | 29.4(3)  |
| C(1)  | 7566.8(13) | 6987.3(12) | 7921.0(12)  | 25.1(3)  |
| C(28) | 5670.9(13) | 2025.3(12) | 9909.4(12)  | 25.2(3)  |
| C(12) | 1601.9(14) | 7287.3(14) | 4581.9(12)  | 28.6(3)  |
| C(6)  | 8983.5(14) | 7420.3(13) | 8024.4(12)  | 29.0(3)  |
| C(14) | 4527.8(13) | 5325.5(12) | 7033.5(11)  | 23.1(3)  |
| C(25) | 7372.1(13) | 830.3(13)  | 8401.5(13)  | 28.4(3)  |
| C(4)  | 8411.1(14) | 7676.8(13) | 5772.9(12)  | 27.8(3)  |
| C(20) | 505.6(13)  | 3123.2(14) | 8657.8(12)  | 29.5(3)  |
| C(11) | 1892.2(14) | 8695.2(14) | 4792.6(12)  | 29.2(3)  |
| C(10) | 3218.1(14) | 9350.9(13) | 5525.9(12)  | 28.0(3)  |
| C(13) | 2619.1(13) | 6539.9(13) | 5120.9(11)  | 24.7(3)  |
| C(27) | 6544.4(14) | 1121.7(13) | 10377.2(13) | 29.7(3)  |
| C(5)  | 9417.6(14) | 7758.7(14) | 6952.8(13)  | 30.3(3)  |
| C(26) | 7393.3(13) | 515.8(13)  | 9624.1(13)  | 30.6(3)  |

**Table 2:** Anisotropic Displacement Parameters ( $\times 10^4$ ) **Q119**. The anisotropic displacement factor exponent takes the form:  $-2\pi^2 [h^2 a^{*2} \times U_{11} + \dots + 2hka^* \times b^* \times U_{12}]$

| Atom  | $U_{11}$ | $U_{22}$ | $U_{33}$ | $U_{23}$ | $U_{13}$ | $U_{12}$ |
|-------|----------|----------|----------|----------|----------|----------|
| C(17) | 27.1(6)  | 23.1(6)  | 15.2(5)  | 6.5(4)   | 2.3(4)   | 2.4(5)   |
| C(7)  | 27.3(6)  | 21.4(6)  | 17.2(5)  | 3.8(5)   | 5.7(5)   | 3.3(5)   |
| C(2)  | 27.3(6)  | 15.9(6)  | 22.2(6)  | 5.0(5)   | 6.1(5)   | 5.0(5)   |
| C(8)  | 26.3(6)  | 24.7(7)  | 18.1(6)  | 6.9(5)   | 8.7(5)   | 4.7(5)   |
| C(16) | 25.1(6)  | 21.4(6)  | 16.4(5)  | 2.4(5)   | 2.0(5)   | 0.3(5)   |
| C(18) | 30.5(7)  | 22.5(7)  | 20.6(6)  | 5.0(5)   | 5.1(5)   | 1.5(5)   |
| C(9)  | 29.4(7)  | 25.7(7)  | 21.2(6)  | 5.4(5)   | 7.4(5)   | 2.9(5)   |
| C(23) | 22.4(6)  | 18.4(6)  | 21.5(6)  | 3.5(5)   | 1.7(5)   | -3.2(5)  |
| C(22) | 28.7(7)  | 22.5(6)  | 20.6(6)  | 6.1(5)   | 2.8(5)   | 3.0(5)   |
| C(3)  | 30.1(7)  | 20.1(6)  | 21.0(6)  | 5.2(5)   | 4.3(5)   | 5.4(5)   |
| C(24) | 24.5(6)  | 24.8(7)  | 24.0(6)  | 6.0(5)   | 5.5(5)   | -1.3(5)  |
| C(15) | 23.8(6)  | 23.2(6)  | 21.3(6)  | 4.7(5)   | 5.0(5)   | 1.6(5)   |
| C(21) | 28.6(7)  | 28.6(7)  | 24.4(6)  | 8.9(5)   | 0.8(5)   | -1.9(5)  |
| C(19) | 34.3(7)  | 31.2(7)  | 25.3(6)  | 8.1(5)   | 8.2(5)   | 11.2(6)  |
| C(1)  | 29.6(7)  | 24.9(7)  | 22.2(6)  | 7.9(5)   | 6.5(5)   | 5.0(5)   |
| C(28) | 29.1(7)  | 22.6(7)  | 23.1(6)  | 4.7(5)   | 6.5(5)   | 0.3(5)   |
| C(12) | 25.3(6)  | 38.8(8)  | 23.5(6)  | 10.0(5)  | 6.5(5)   | 5.1(6)   |
| C(6)  | 28.3(7)  | 30.4(7)  | 26.7(6)  | 7.9(5)   | 1.9(5)   | 5.2(6)   |
| C(14) | 23.4(6)  | 24.9(7)  | 20.5(6)  | 5.3(5)   | 4.5(5)   | 2.3(5)   |
| C(25) | 23.1(6)  | 26.3(7)  | 35.3(7)  | 4.6(5)   | 7.8(5)   | 2.5(5)   |
| C(4)  | 33.1(7)  | 26.8(7)  | 27.7(6)  | 9.2(5)   | 12.5(5)  | 5.9(6)   |
| C(20) | 24.1(6)  | 40.9(8)  | 24.8(6)  | 11.9(6)  | 4.5(5)   | 5.1(6)   |

| Atom  | $U_{11}$ | $U_{22}$ | $U_{33}$ | $U_{23}$ | $U_{13}$ | $U_{12}$ |
|-------|----------|----------|----------|----------|----------|----------|
| C(11) | 32.5(7)  | 36.4(8)  | 25.2(6)  | 12.7(5)  | 10.7(5)  | 15.4(6)  |
| C(10) | 37.8(7)  | 24.8(7)  | 25.8(6)  | 8.2(5)   | 12.1(5)  | 9.5(6)   |
| C(13) | 28.0(7)  | 25.1(7)  | 22.3(6)  | 6.6(5)   | 8.1(5)   | 1.9(5)   |
| C(27) | 33.9(7)  | 27.6(7)  | 26.0(6)  | 10.3(5)  | 2.2(5)   | 0.5(6)   |
| C(5)  | 24.5(7)  | 31.5(7)  | 36.1(7)  | 9.3(6)   | 8.6(5)   | 3.7(6)   |
| C(26) | 26.8(7)  | 25.4(7)  | 37.6(7)  | 10.7(6)  | 1.0(5)   | 3.2(5)   |

**Table 3:** Bond Lengths in Å for **Q119**.

| Atom  | Atom  | Length/Å   | Atom  | Atom  | Length/Å   |
|-------|-------|------------|-------|-------|------------|
| C(17) | C(16) | 1.4885(17) | C(22) | C(21) | 1.3851(18) |
| C(17) | C(18) | 1.3975(17) | C(3)  | C(4)  | 1.3801(18) |
| C(17) | C(22) | 1.3983(18) | C(24) | C(25) | 1.3857(17) |
| C(7)  | C(2)  | 1.4863(17) | C(15) | C(14) | 1.4436(16) |
| C(7)  | C(8)  | 1.4907(16) | C(21) | C(20) | 1.3860(19) |
| C(7)  | C(14) | 1.3574(17) | C(19) | C(20) | 1.386(2)   |
| C(2)  | C(3)  | 1.4020(17) | C(1)  | C(6)  | 1.3849(18) |
| C(2)  | C(1)  | 1.4009(16) | C(28) | C(27) | 1.3833(17) |
| C(8)  | C(9)  | 1.3961(18) | C(12) | C(11) | 1.386(2)   |
| C(8)  | C(13) | 1.4040(17) | C(12) | C(13) | 1.3832(18) |
| C(16) | C(23) | 1.4871(16) | C(6)  | C(5)  | 1.3872(19) |
| C(16) | C(15) | 1.3614(17) | C(25) | C(26) | 1.3874(19) |
| C(18) | C(19) | 1.3826(18) | C(4)  | C(5)  | 1.3895(18) |
| C(9)  | C(10) | 1.3875(17) | C(11) | C(10) | 1.3845(19) |
| C(23) | C(24) | 1.3956(17) | C(27) | C(26) | 1.3853(19) |
| C(23) | C(28) | 1.4019(17) |       |       |            |

**Table 4:** Bond Angles in ° for **Q119**.

| Atom  | Atom  | Atom  | Angle/°    | Atom  | Atom  | Atom  | Angle/°    |
|-------|-------|-------|------------|-------|-------|-------|------------|
| C(18) | C(17) | C(16) | 121.96(11) | C(6)  | C(1)  | C(2)  | 120.76(11) |
| C(18) | C(17) | C(22) | 117.89(11) | C(27) | C(28) | C(23) | 120.87(12) |
| C(22) | C(17) | C(16) | 120.15(11) | C(13) | C(12) | C(11) | 120.36(12) |
| C(2)  | C(7)  | C(8)  | 117.53(10) | C(1)  | C(6)  | C(5)  | 120.66(11) |
| C(14) | C(7)  | C(2)  | 124.25(10) | C(7)  | C(14) | C(15) | 128.74(11) |
| C(14) | C(7)  | C(8)  | 118.21(11) | C(24) | C(25) | C(26) | 120.20(12) |
| C(3)  | C(2)  | C(7)  | 119.87(10) | C(3)  | C(4)  | C(5)  | 120.18(12) |
| C(1)  | C(2)  | C(7)  | 122.41(11) | C(21) | C(20) | C(19) | 119.26(12) |
| C(1)  | C(2)  | C(3)  | 117.71(11) | C(10) | C(11) | C(12) | 119.65(11) |
| C(9)  | C(8)  | C(7)  | 120.81(11) | C(11) | C(10) | C(9)  | 120.14(12) |
| C(9)  | C(8)  | C(13) | 117.91(11) | C(12) | C(13) | C(8)  | 120.83(12) |
| C(13) | C(8)  | C(7)  | 121.22(11) | C(28) | C(27) | C(26) | 120.29(12) |
| C(23) | C(16) | C(17) | 117.21(10) | C(6)  | C(5)  | C(4)  | 119.28(12) |
| C(15) | C(16) | C(17) | 122.85(11) | C(27) | C(26) | C(25) | 119.58(12) |
| C(15) | C(16) | C(23) | 119.94(11) |       |       |       |            |
| C(19) | C(18) | C(17) | 120.92(12) |       |       |       |            |
| C(10) | C(9)  | C(8)  | 121.07(12) |       |       |       |            |
| C(24) | C(23) | C(16) | 121.15(10) |       |       |       |            |
| C(24) | C(23) | C(28) | 118.04(11) |       |       |       |            |
| C(28) | C(23) | C(16) | 120.81(11) |       |       |       |            |
| C(21) | C(22) | C(17) | 121.00(12) |       |       |       |            |
| C(4)  | C(3)  | C(2)  | 121.38(11) |       |       |       |            |
| C(25) | C(24) | C(23) | 120.96(11) |       |       |       |            |
| C(16) | C(15) | C(14) | 125.11(11) |       |       |       |            |
| C(22) | C(21) | C(20) | 120.33(12) |       |       |       |            |
| C(18) | C(19) | C(20) | 120.54(12) |       |       |       |            |

**Table 5:** Hydrogen Fractional Atomic Coordinates ( $\times 10^4$ ) and Equivalent Isotropic Displacement Parameters ( $\text{\AA}^2 \times 10^3$ ) for **Q119**.  $U_{eq}$  is defined as 1/3 of the trace of the orthogonalised  $U_{ij}$ .

| Atom  | x        | y        | z        | $U_{eq}$ |
|-------|----------|----------|----------|----------|
| H(18) | 3290.03  | 5331.52  | 9089.34  | 30       |
| H(9)  | 5126.22  | 9055.46  | 6564.19  | 30       |
| H(22) | 2837.93  | 1267.48  | 7858.6   | 29       |
| H(3)  | 6331.52  | 7224.91  | 4880.92  | 29       |
| H(24) | 6537.83  | 1983.72  | 7135.53  | 30       |
| H(15) | 6276.03  | 4407.2   | 7640.6   | 28       |
| H(21) | 522.97   | 1110.16  | 8041.19  | 34       |
| H(19) | 975.37   | 5165.65  | 9262.91  | 35       |
| H(1)  | 7292.98  | 6762.63  | 8647.98  | 30       |
| H(28) | 5077.7   | 2398.47  | 10407.56 | 30       |
| H(12) | 718.32   | 6842.75  | 4075.35  | 34       |
| H(6)  | 9650.56  | 7484.74  | 8820.24  | 35       |
| H(14) | 3552     | 5183.05  | 6940.35  | 28       |
| H(25) | 7925.26  | 412.01   | 7884.29  | 34       |
| H(4)  | 8691.39  | 7904.36  | 5049.82  | 33       |
| H(20) | -430.8   | 3060.19  | 8723.57  | 35       |
| H(11) | 1200.08  | 9196.71  | 4443.36  | 35       |
| H(10) | 3425.18  | 10293.22 | 5651.37  | 34       |
| H(13) | 2415.86  | 5594.84  | 4964.47  | 30       |
| H(27) | 6561.85  | 919.96   | 11200.88 | 36       |
| H(5)  | 10371.86 | 8037.32  | 7023.33  | 36       |
| H(26) | 7973.65  | -97.98   | 9936.18  | 37       |

### References:

1. Cheng, J. S.; Tang, L. H.; Xu, J. Y. *Adv. Synth. Catal.* **2010**, 352, 3275.
2. Volger, H. C. *Wiley* **1967**, 86, 677-686.
3. Itami, K.; Ushioji, Y.; Nokami, T.; Ohashi, Y.; Yoshida, J.-I. *Org. Lett.*, **2004**, 6, 3695-3698.  
Wang, Z.; Zhang, G.; Guzei, I.; Verkade, J. G. *J. Org. Chem.* **2001**, 66, 3521.
4. Wang, Z.; Zhang, G.; Guzei, I.; Verkade, J. G. *J. Org. Chem.* **2001**, 66, 3521.
5. Marnell, M. W.; Li, B.; Zhou, T.; Jespersen, K. K.; Brennessel, W. W.; Emge, T. J.; Goldman, A. S.; Jones, W. D. *J. Am. Chem. Soc.* **2017**, 139, 8977-8989.
6. Parrish, J. P.; Jung, Y. C.; Floyd, R. J.; Jung, K. W. *Tetrahedron Lett.* **2002**, 43, 7899-7902.
7. Mulla, S. A. R.; Chavan, S. S.; Pathan, M. Y.; Inamdar, S. M.; Shaikh, T. M. Y. *RSC Adv.* **2015**, 5, 24675-24680.

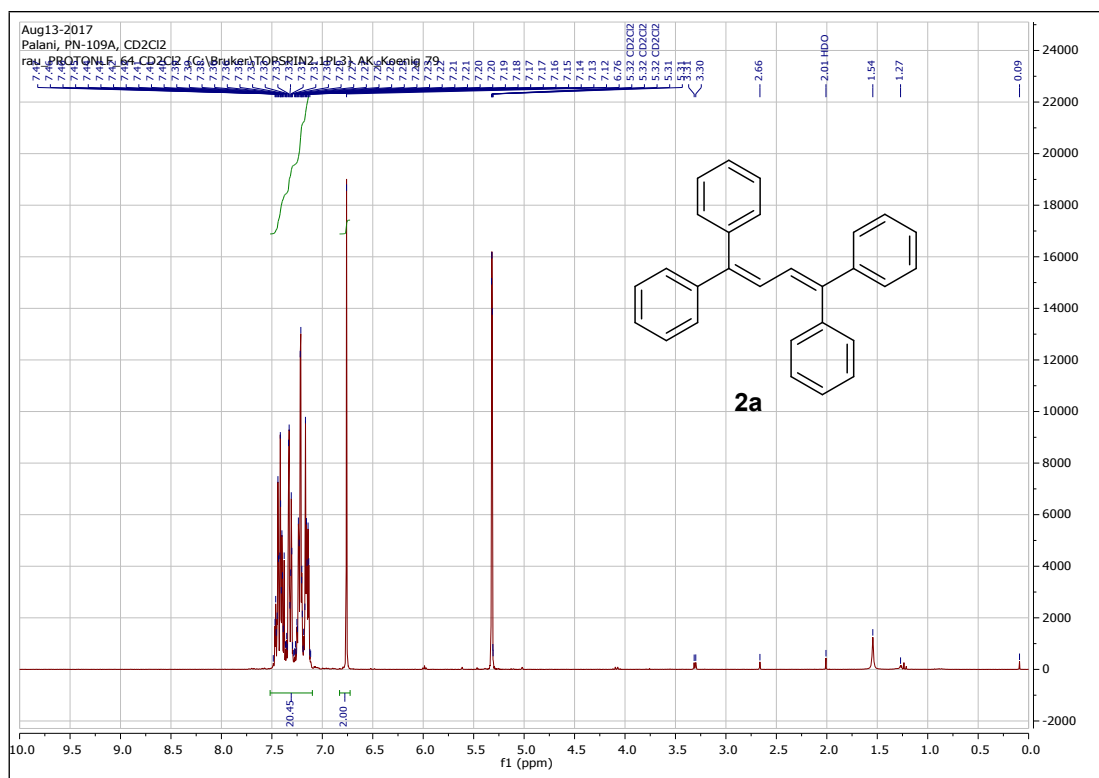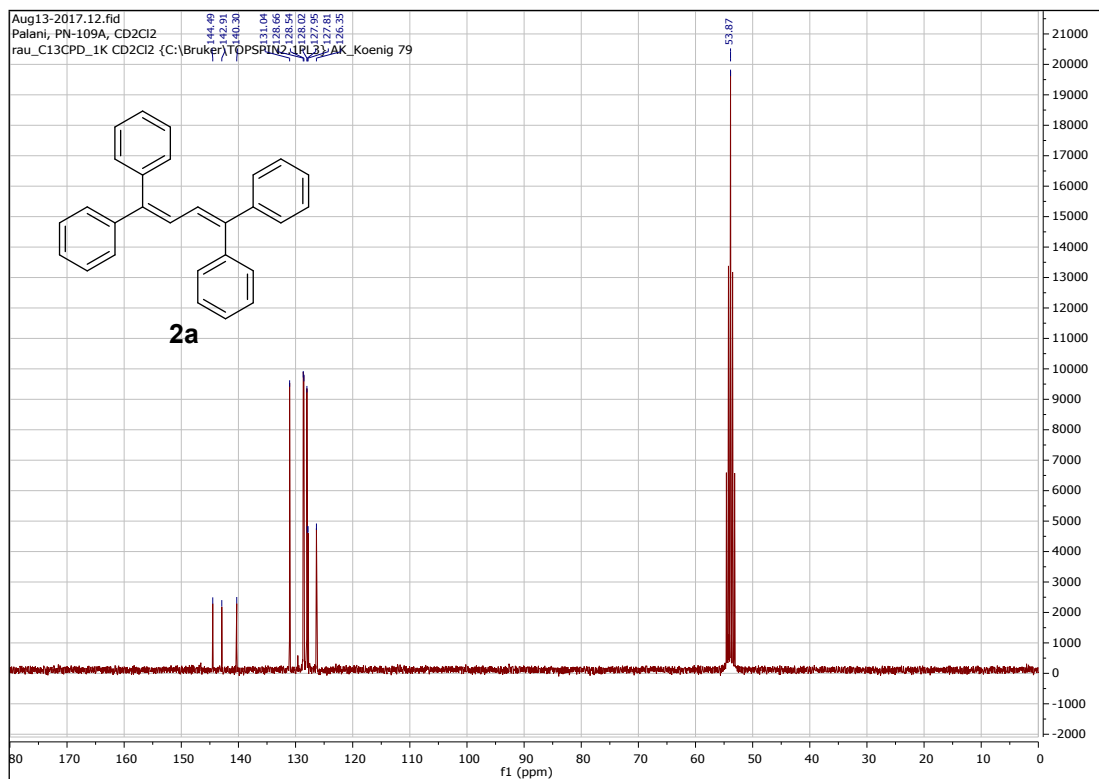

Figure S1.  $^1\text{H}$  (top, 300 MHz) and  $^{13}\text{C}$  (bottom, 75 MHz) NMR spectra of **2a** in  $\text{CD}_2\text{Cl}_2$ .



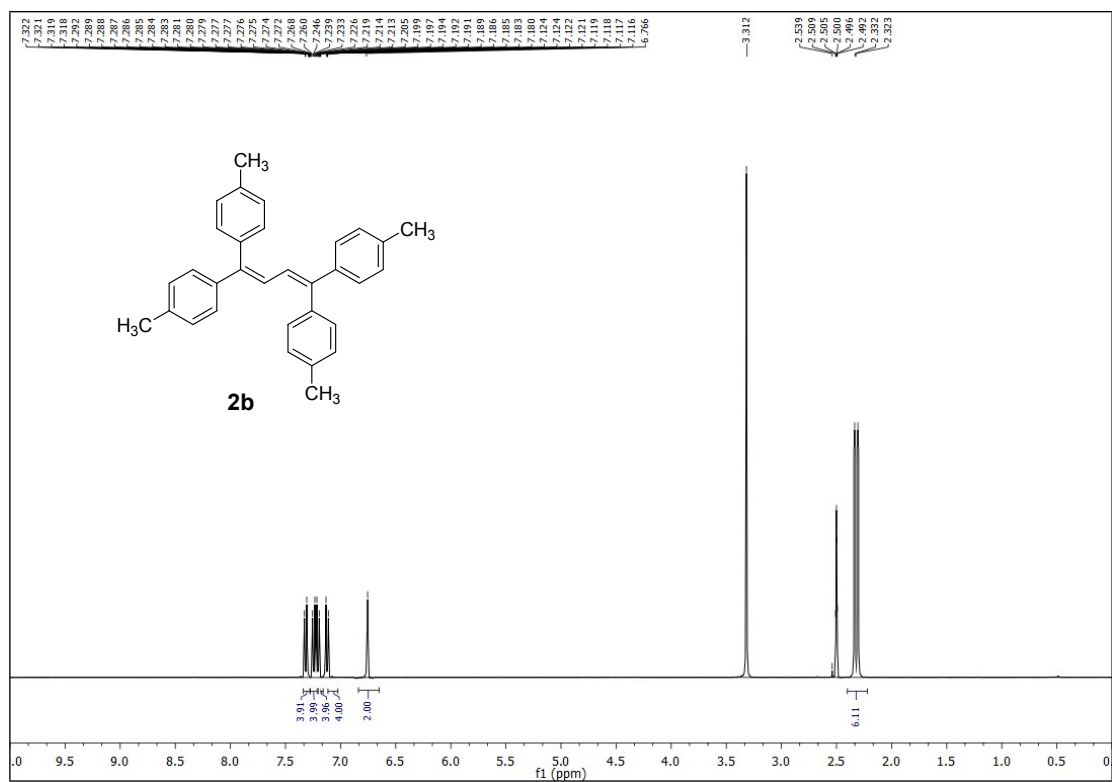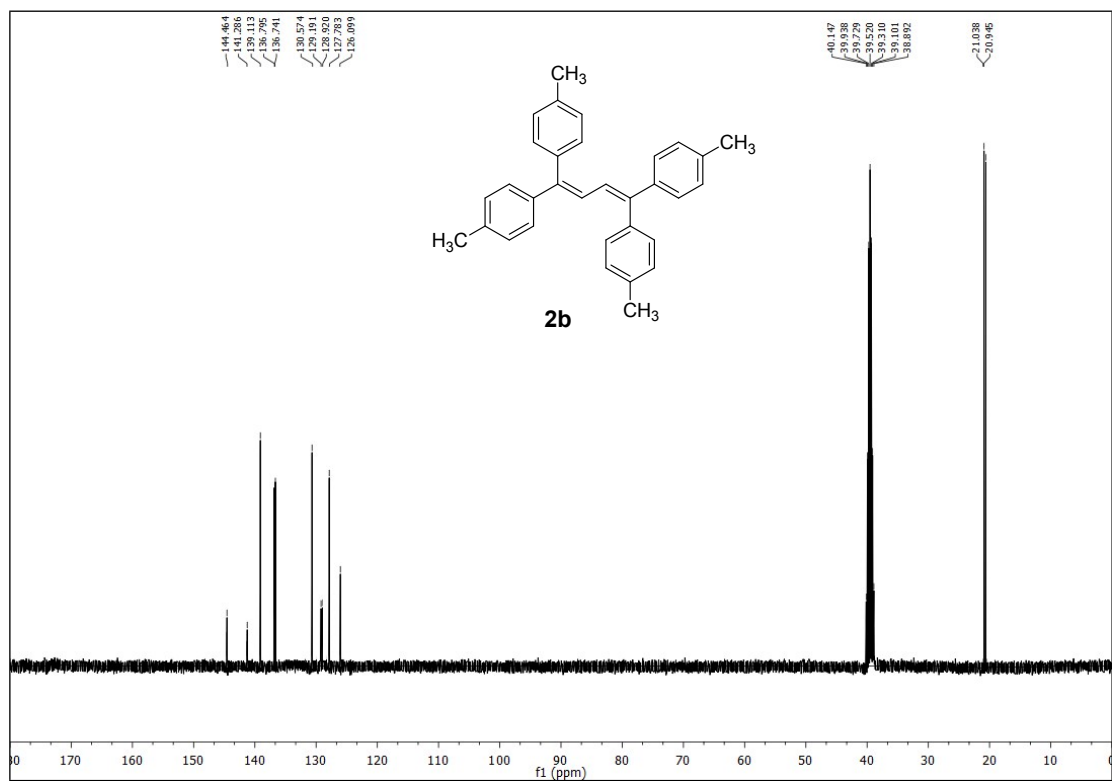

Figure S2. <sup>1</sup>H (top, 300 MHz) and <sup>13</sup>C (bottom, 75 MHz) NMR spectra of **2b** in DMSO-d<sub>6</sub>.

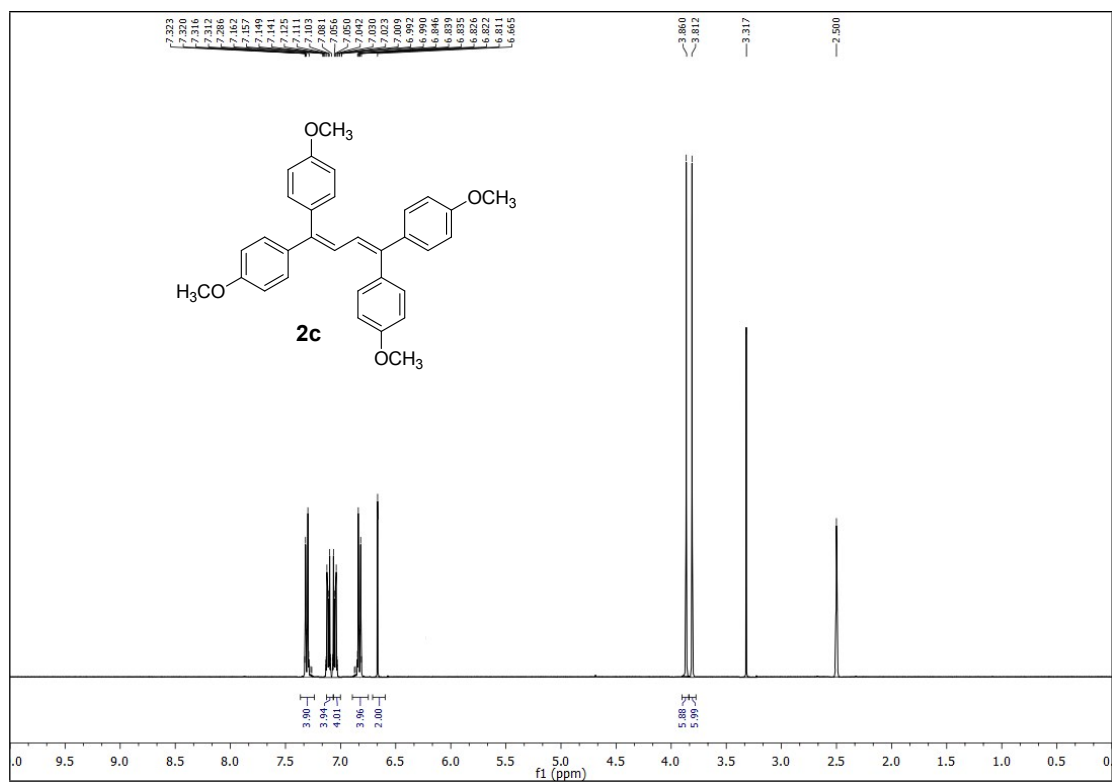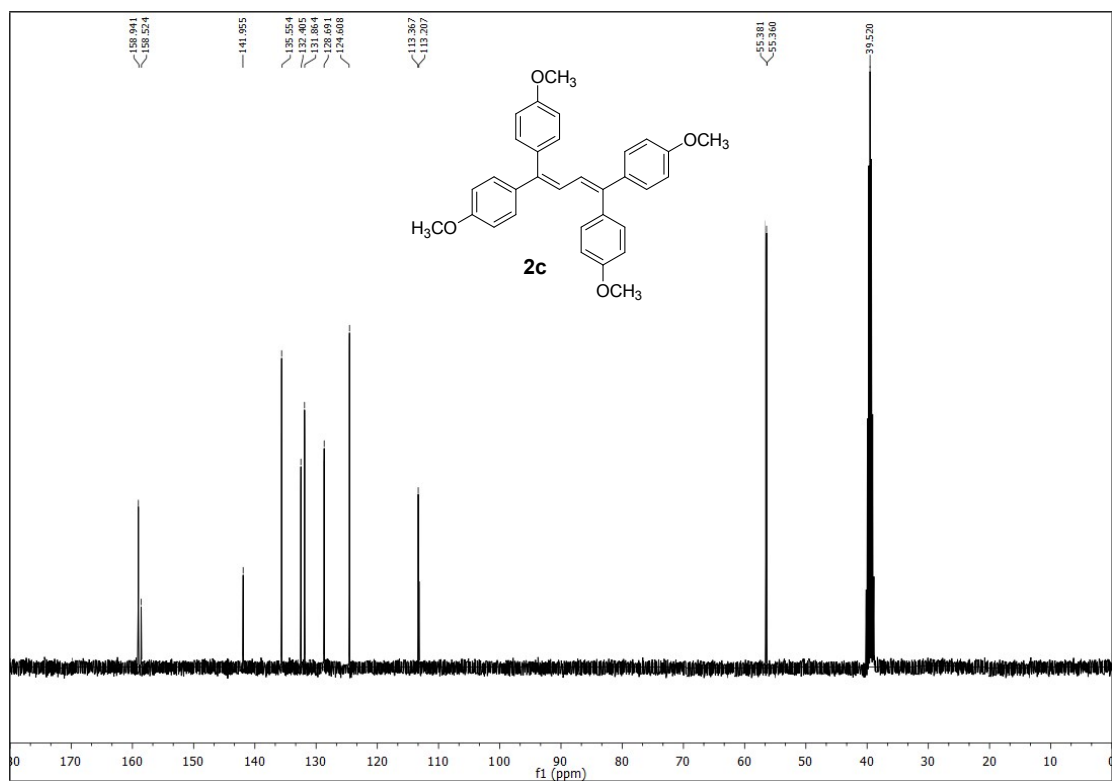

Figure S3. <sup>1</sup>H (top, 300 MHz) and <sup>13</sup>C (bottom, 75 MHz) NMR spectra of **2c** in DMSO-d<sub>6</sub>.

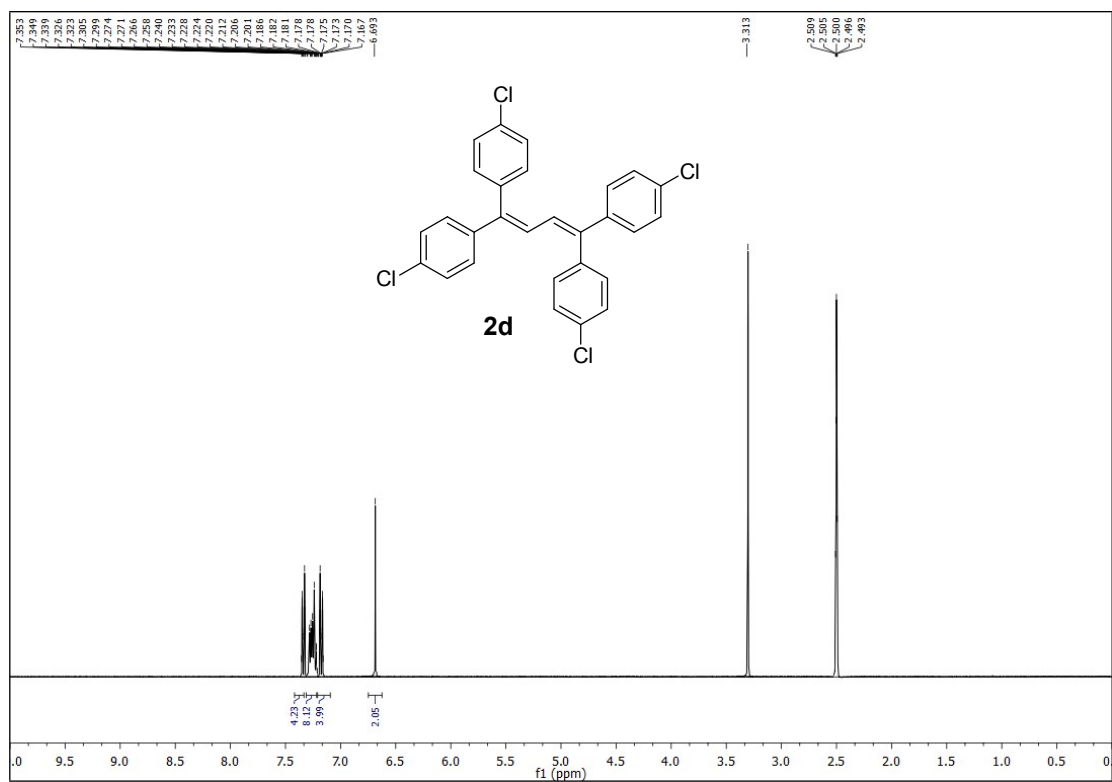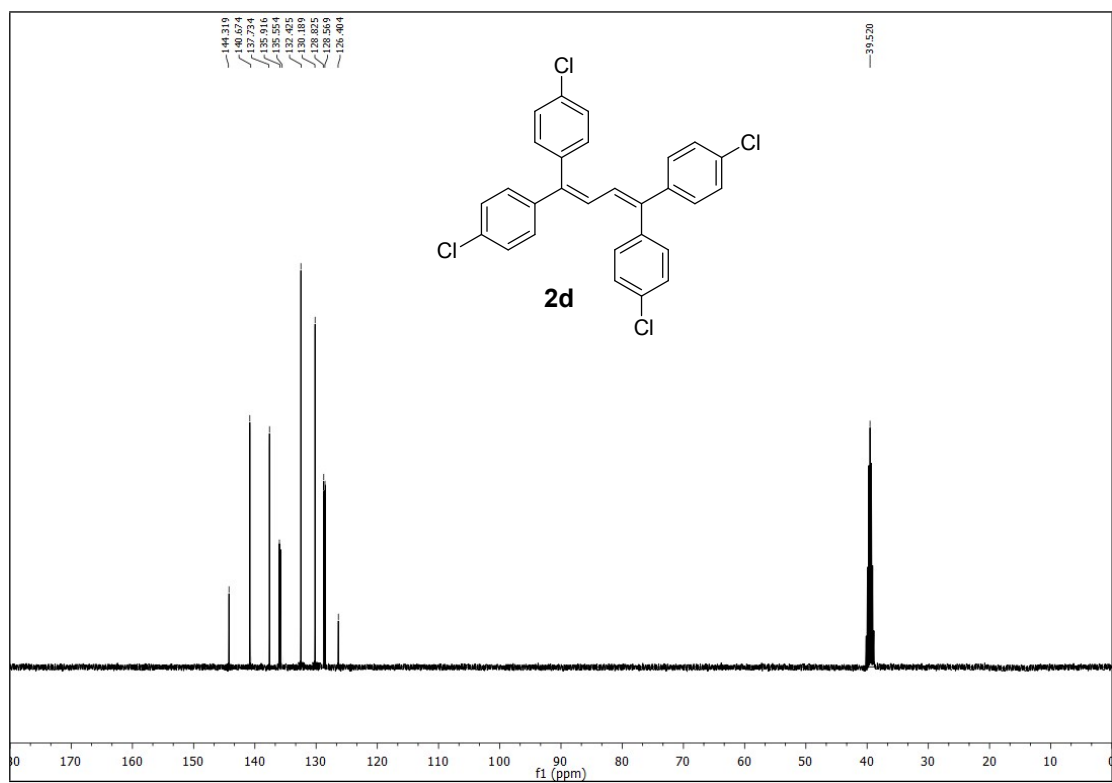

**Figure S4.** <sup>1</sup>H (top, 300 MHz) and <sup>13</sup>C (bottom, 75 MHz) NMR spectra of **2d** in DMSO-d<sub>6</sub>.

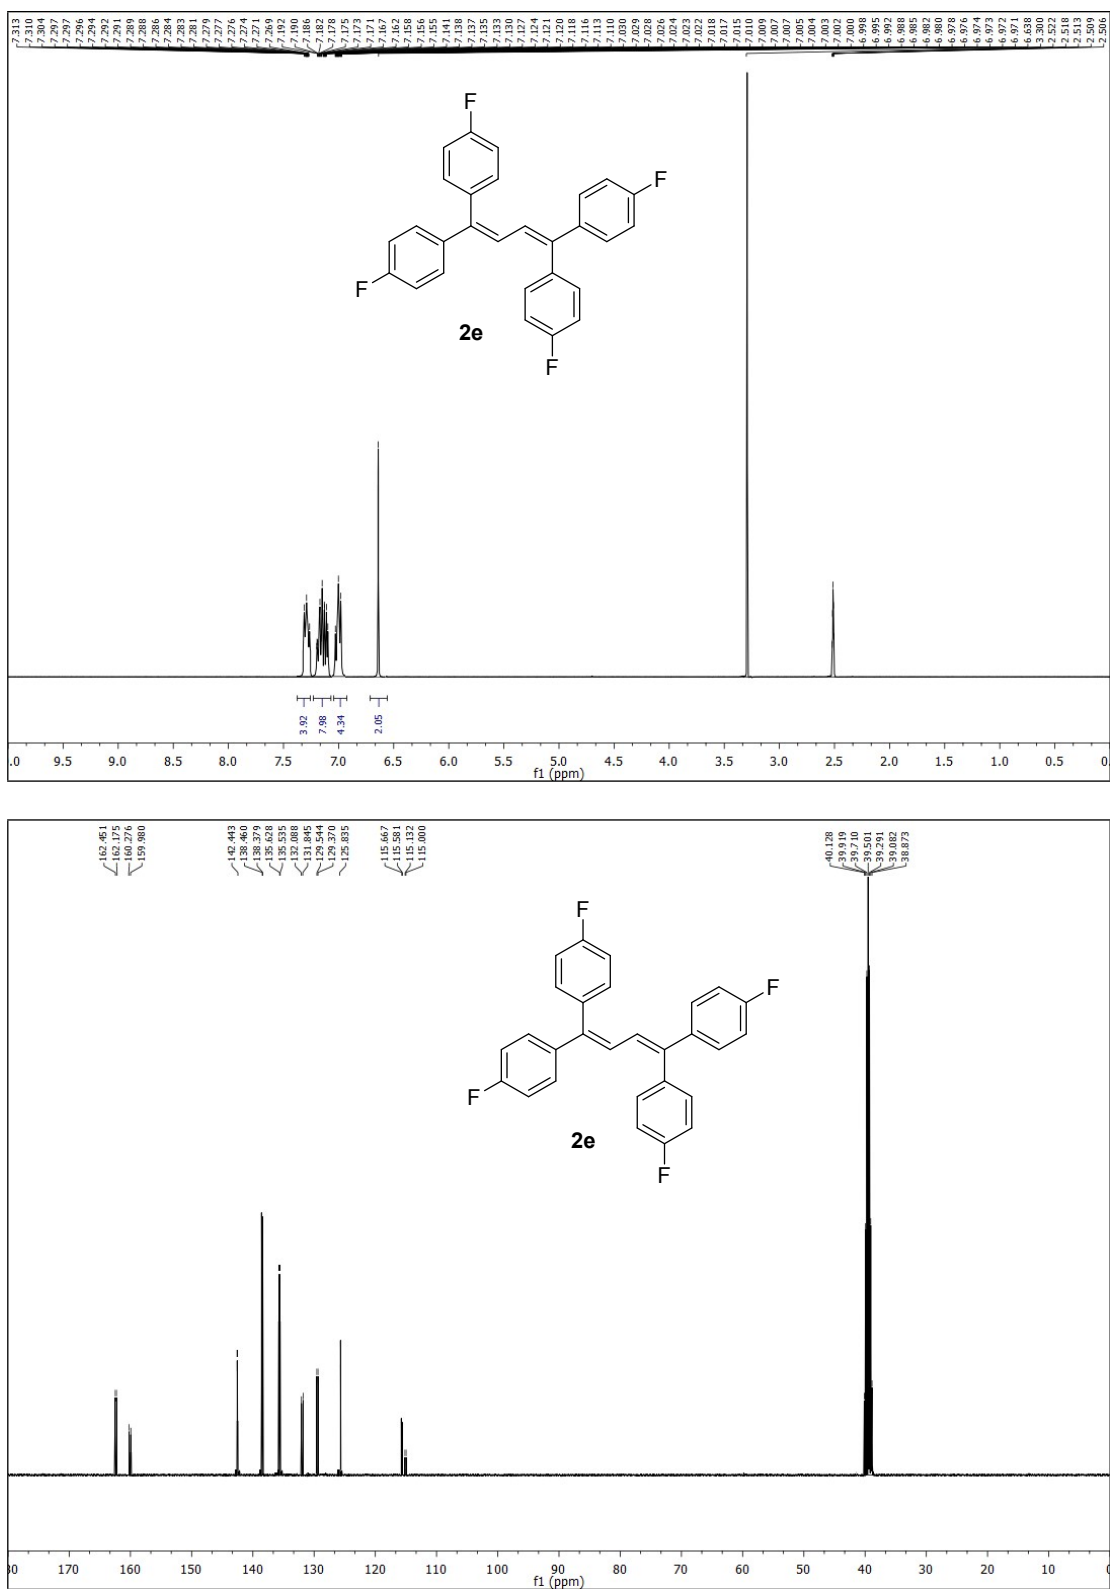

Figure S5.  $^1\text{H}$  (top, 300 MHz) and  $^{13}\text{C}$  (bottom, 75 MHz) NMR spectra of **2e** in DMSO- $d_6$ .

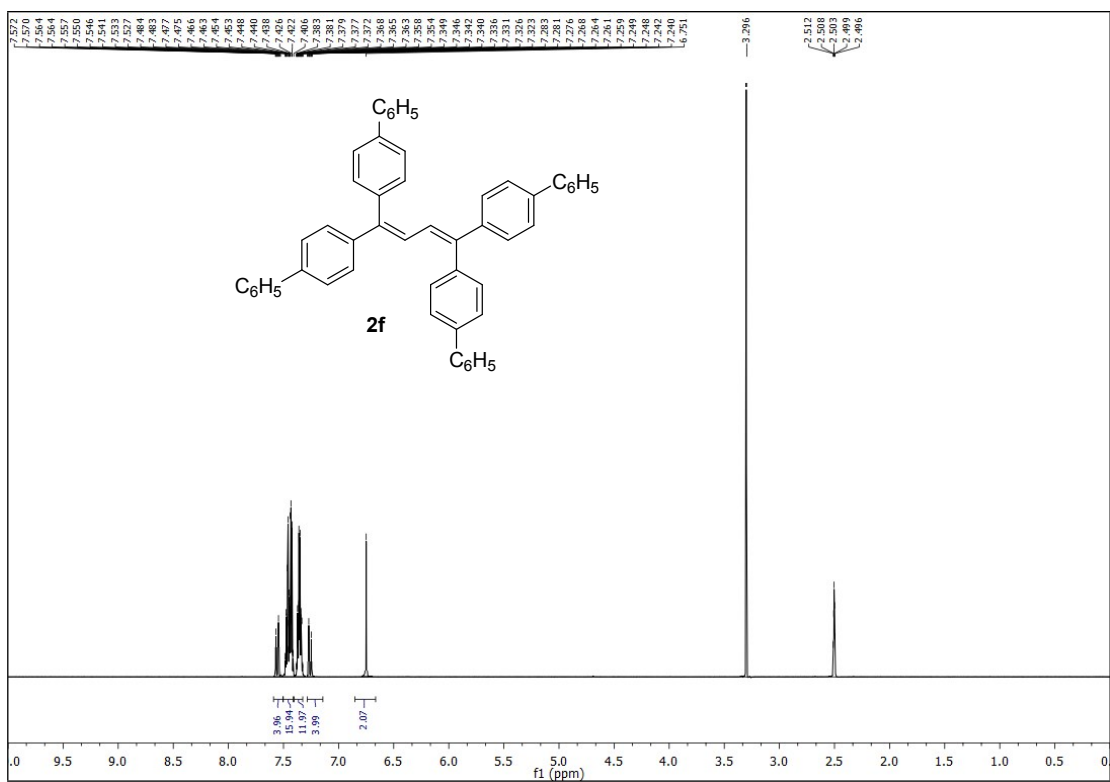

Figure S6. <sup>1</sup>H (300 MHz) NMR spectra of **2f** in DMSO-d<sub>6</sub>.

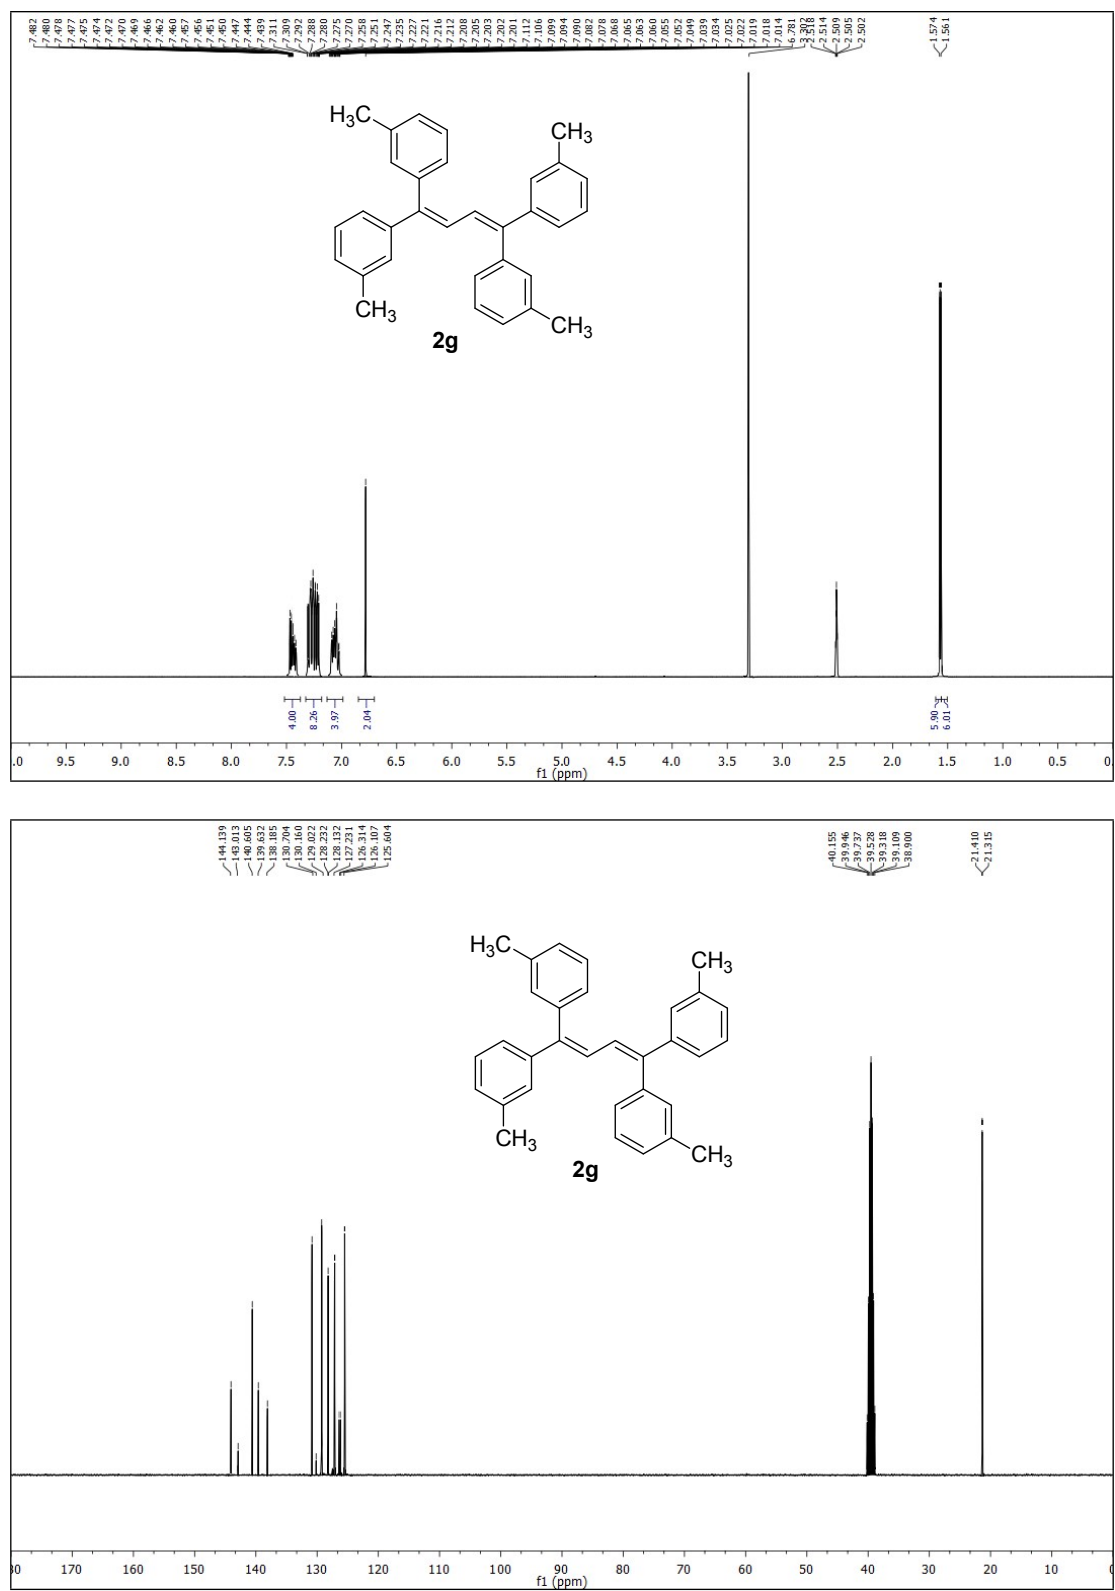

**Figure S7.** <sup>1</sup>H (top, 300 MHz) and <sup>13</sup>C (bottom, 75 MHz) NMR spectra of **2g** in DMSO-d<sub>6</sub>.

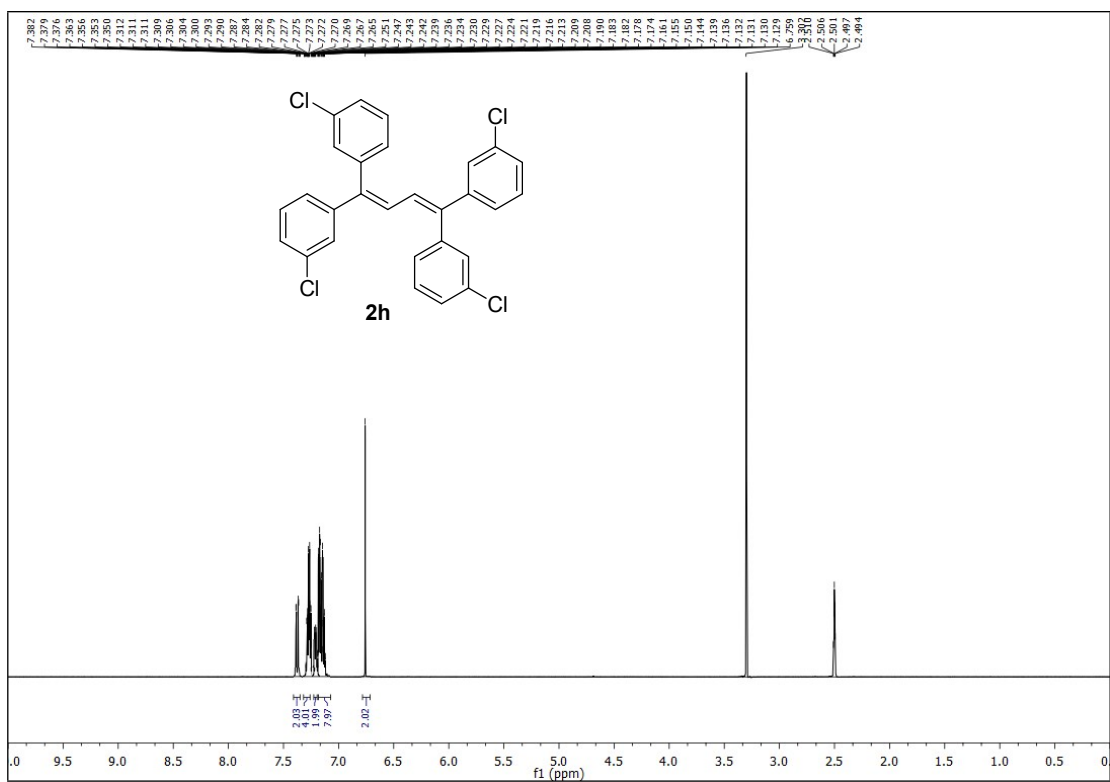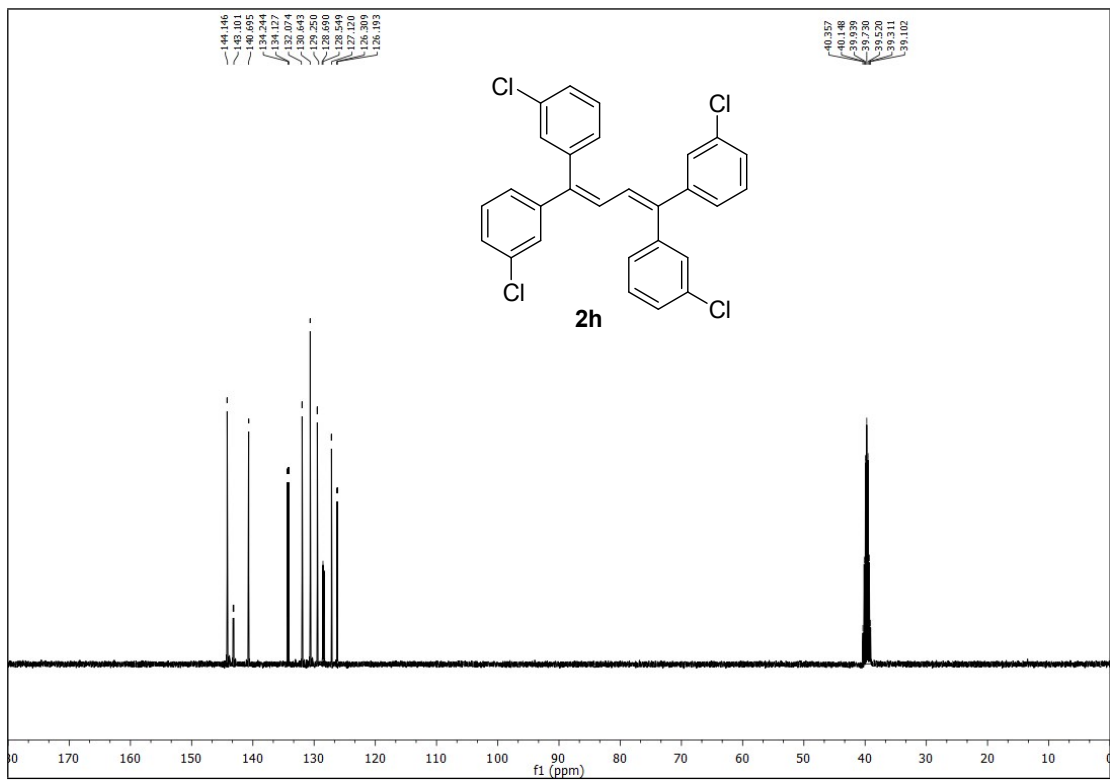

**Figure S8.** <sup>1</sup>H (top, 300 MHz) and <sup>13</sup>C (bottom, 75 MHz) NMR spectra of **2h** in DMSO-d<sub>6</sub>.

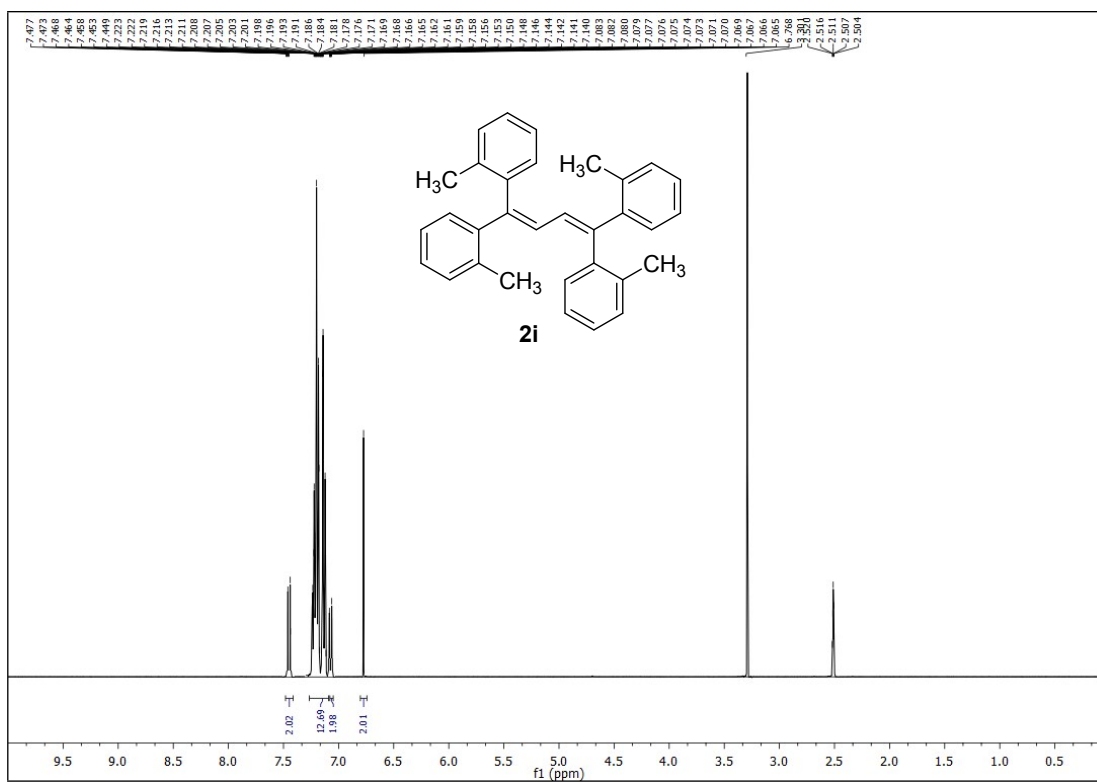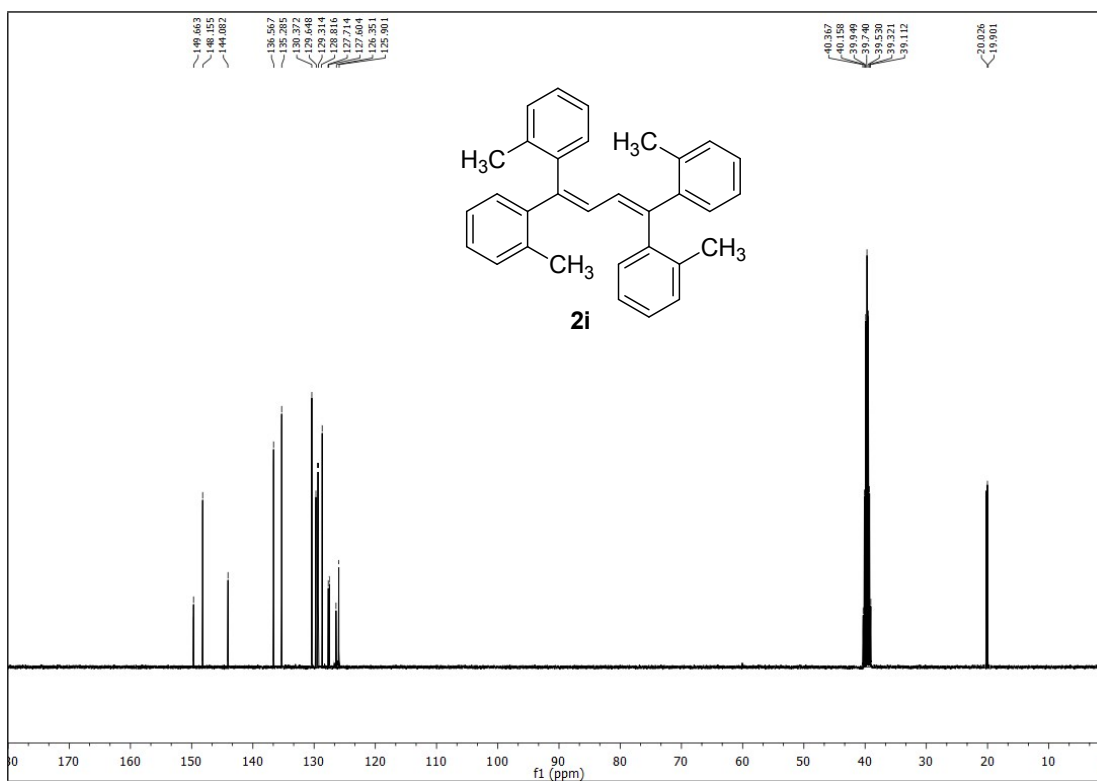

**Figure S9.** <sup>1</sup>H (top, 300 MHz) and <sup>13</sup>C (bottom, 75 MHz) NMR spectra of **2i** in DMSO-d<sub>6</sub>.



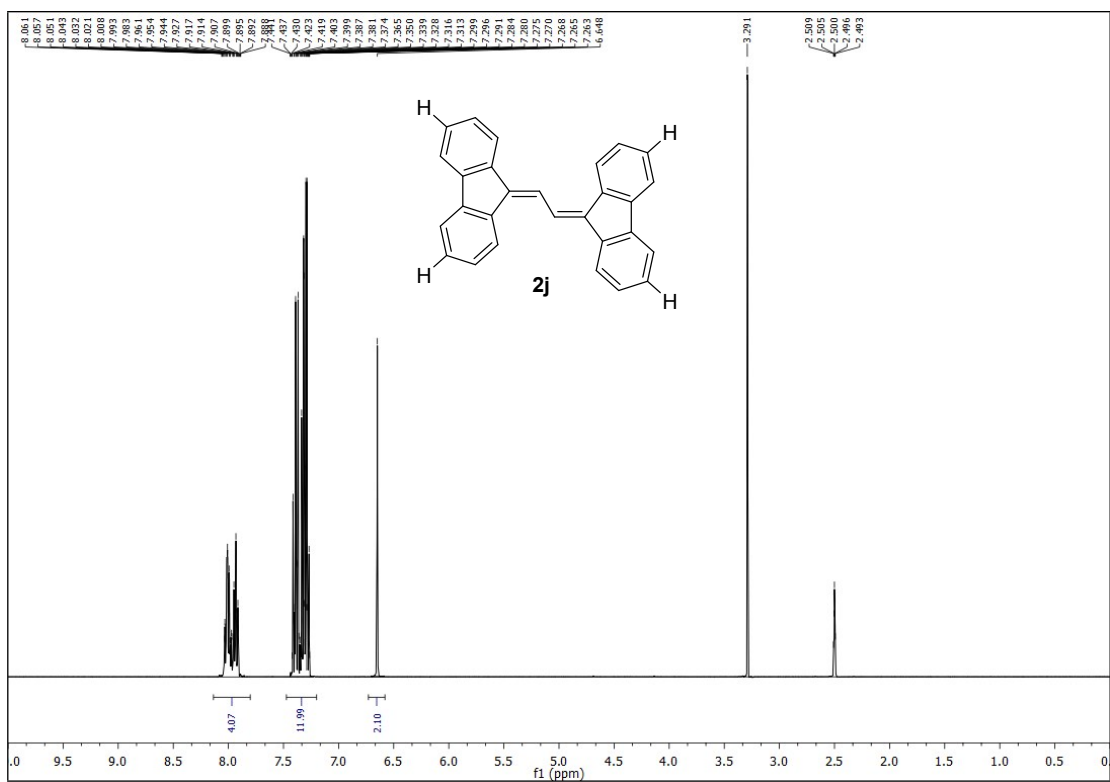

**Figure S10.**  $^1\text{H}$  (300 MHz) NMR spectra of **2j** in  $\text{DMSO-d}_6$ .

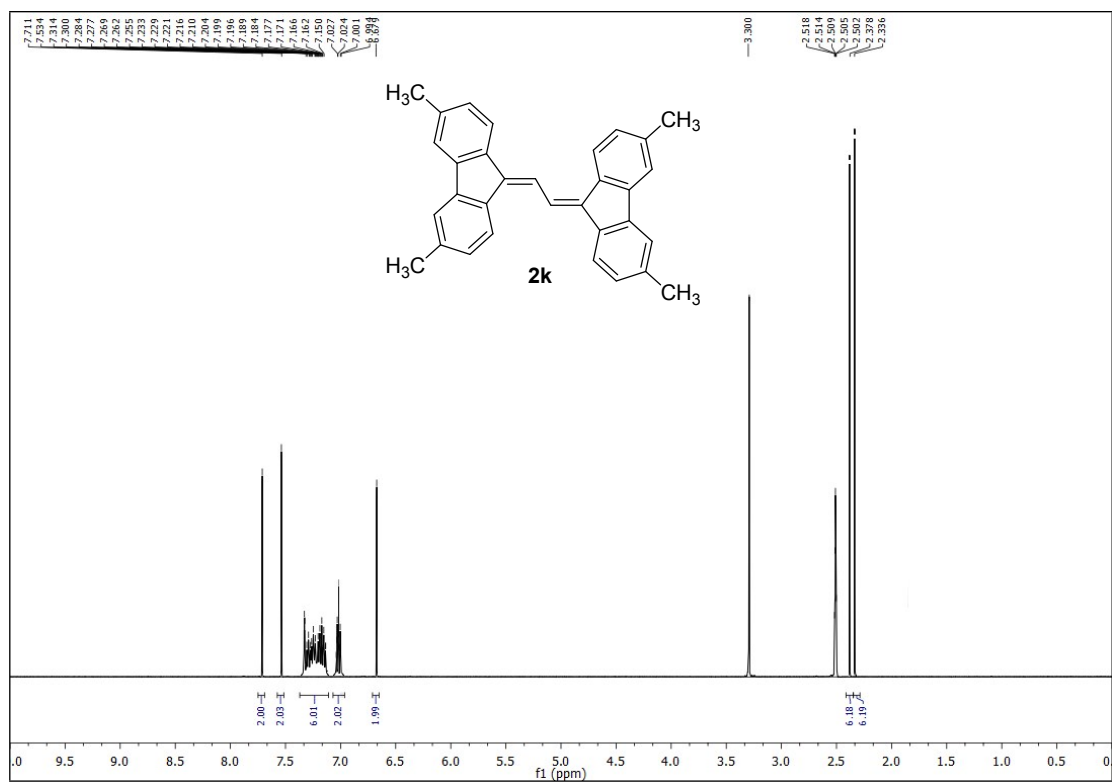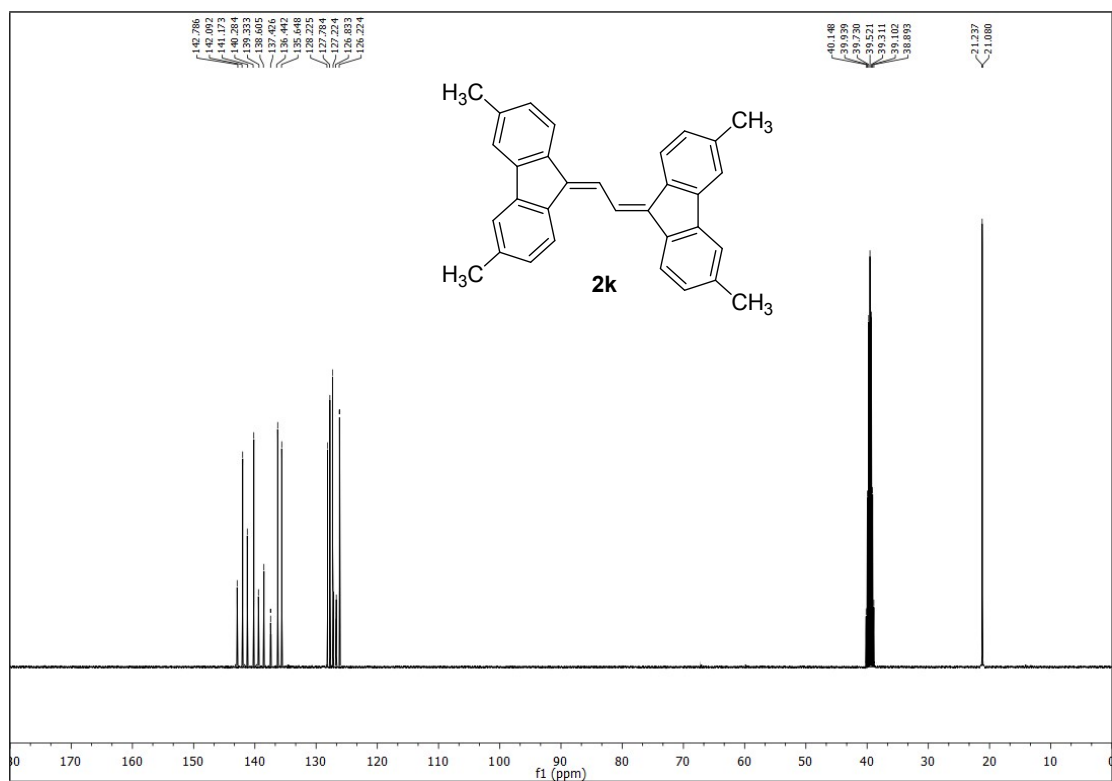

**Figure S11.** <sup>1</sup>H (top, 300 MHz) and <sup>13</sup>C (bottom, 75 MHz) NMR spectra of **2k** in DMSO-d<sub>6</sub>.

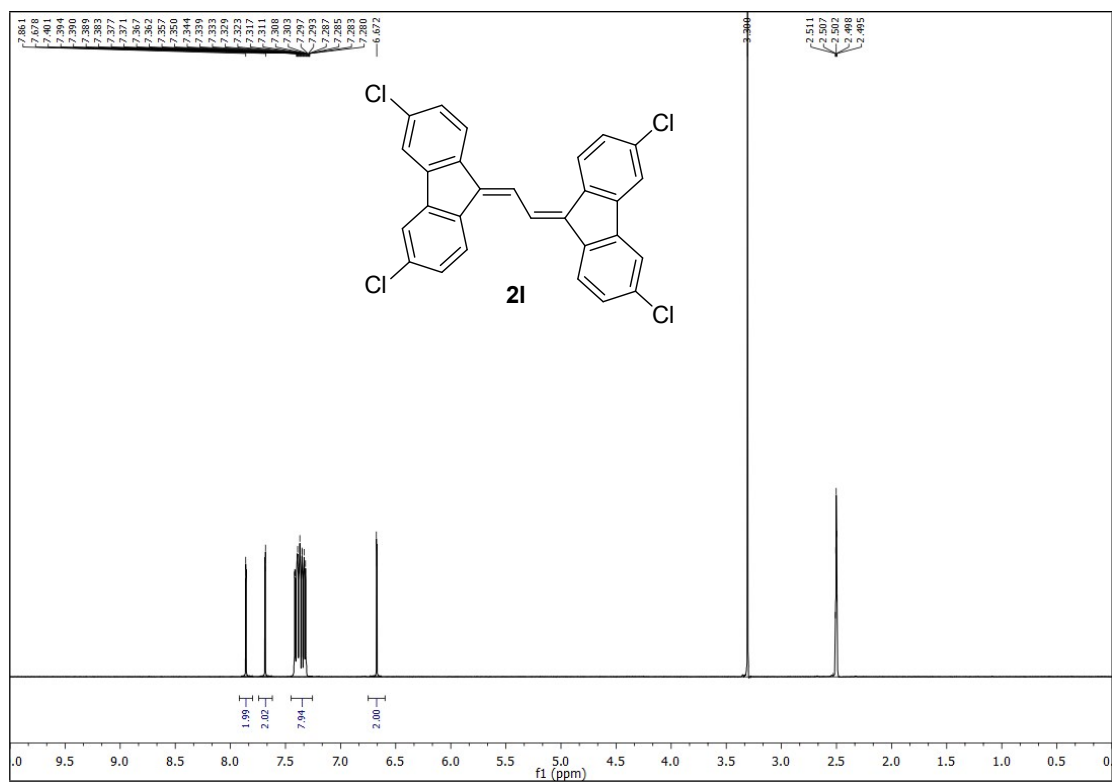

**Figure S12.** <sup>1</sup>H (300 MHz) NMR spectra of **21** in DMSO-d<sub>6</sub>.

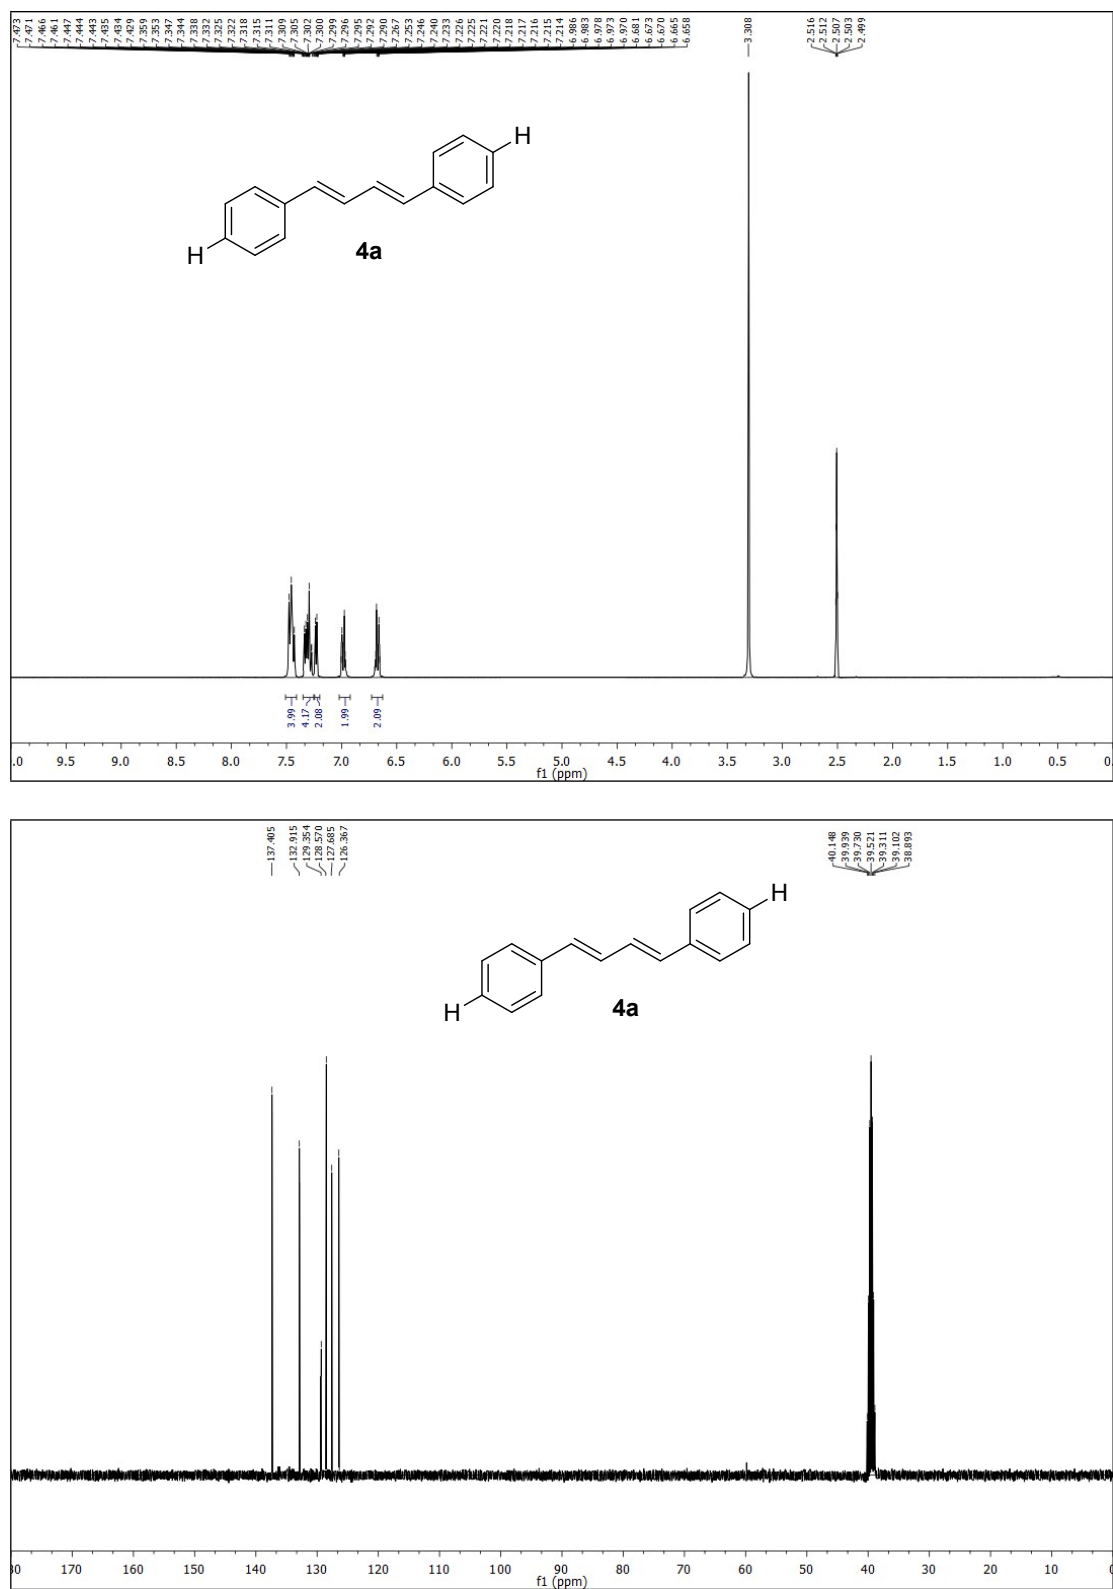

**Figure S13.** <sup>1</sup>H (top, 300 MHz) and <sup>13</sup>C (bottom, 75 MHz) NMR spectra of **4a** in DMSO-d<sub>6</sub>.

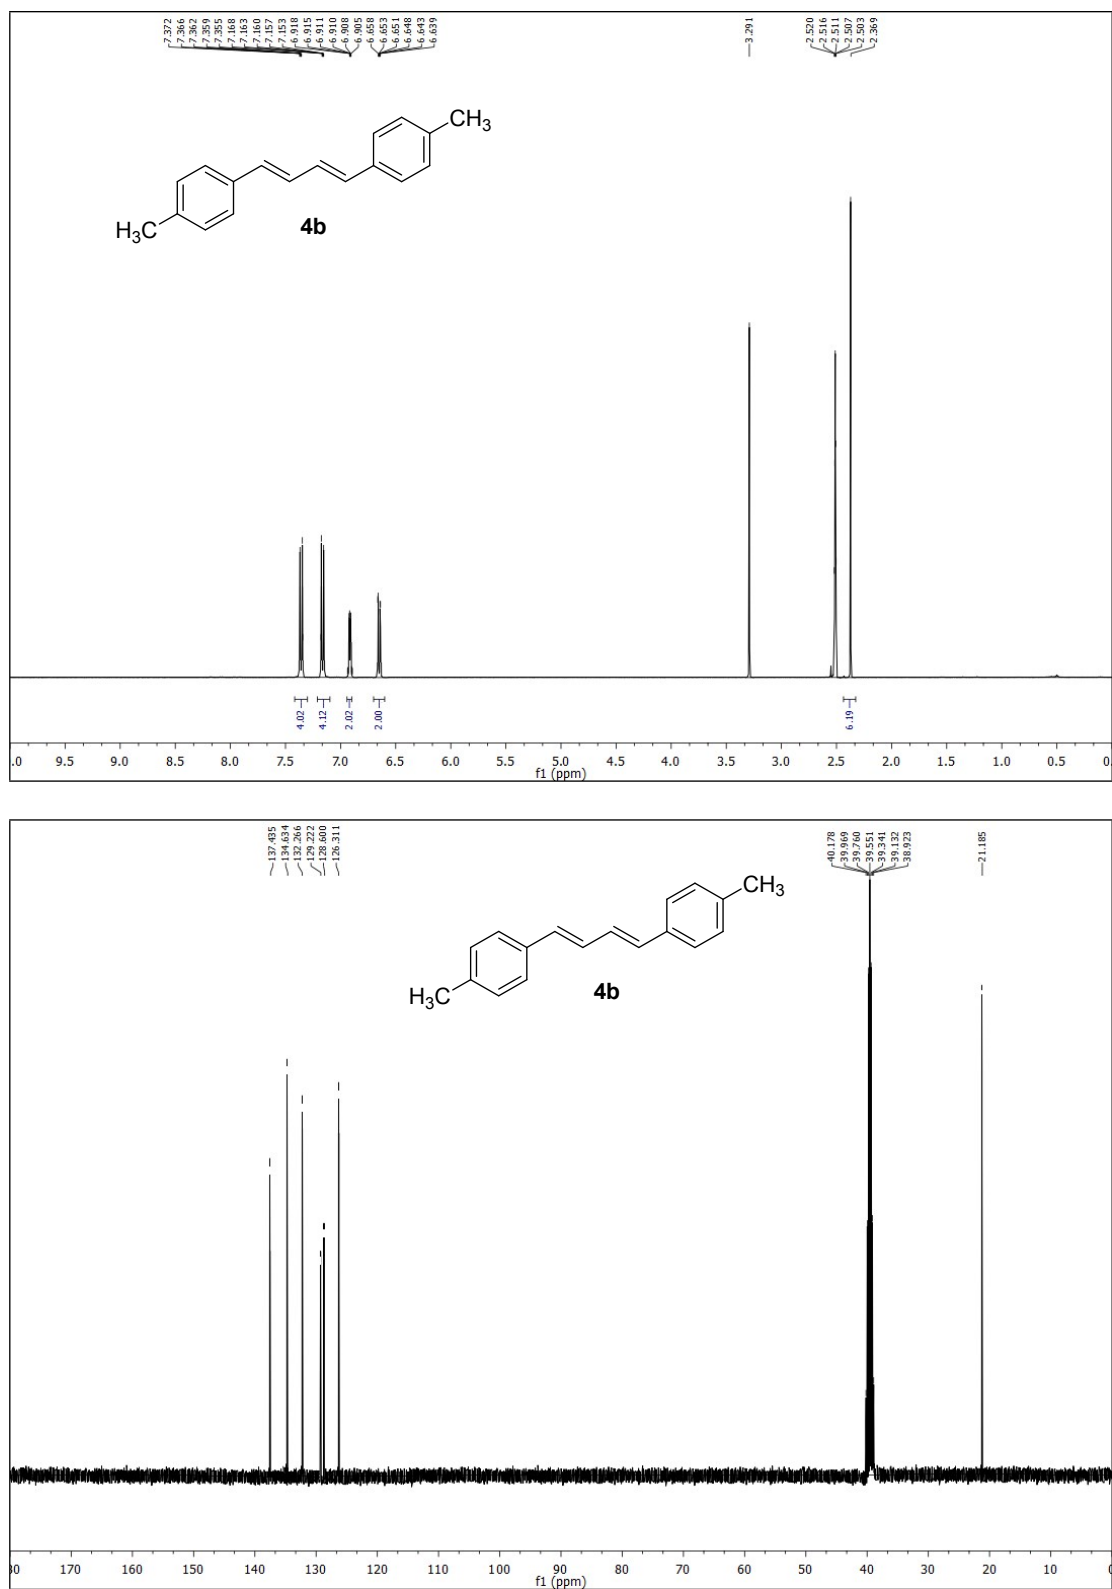

Figure S14. <sup>1</sup>H (top, 300 MHz) and <sup>13</sup>C (bottom, 75 MHz) NMR spectra of **4b** in DMSO-d<sub>6</sub>.

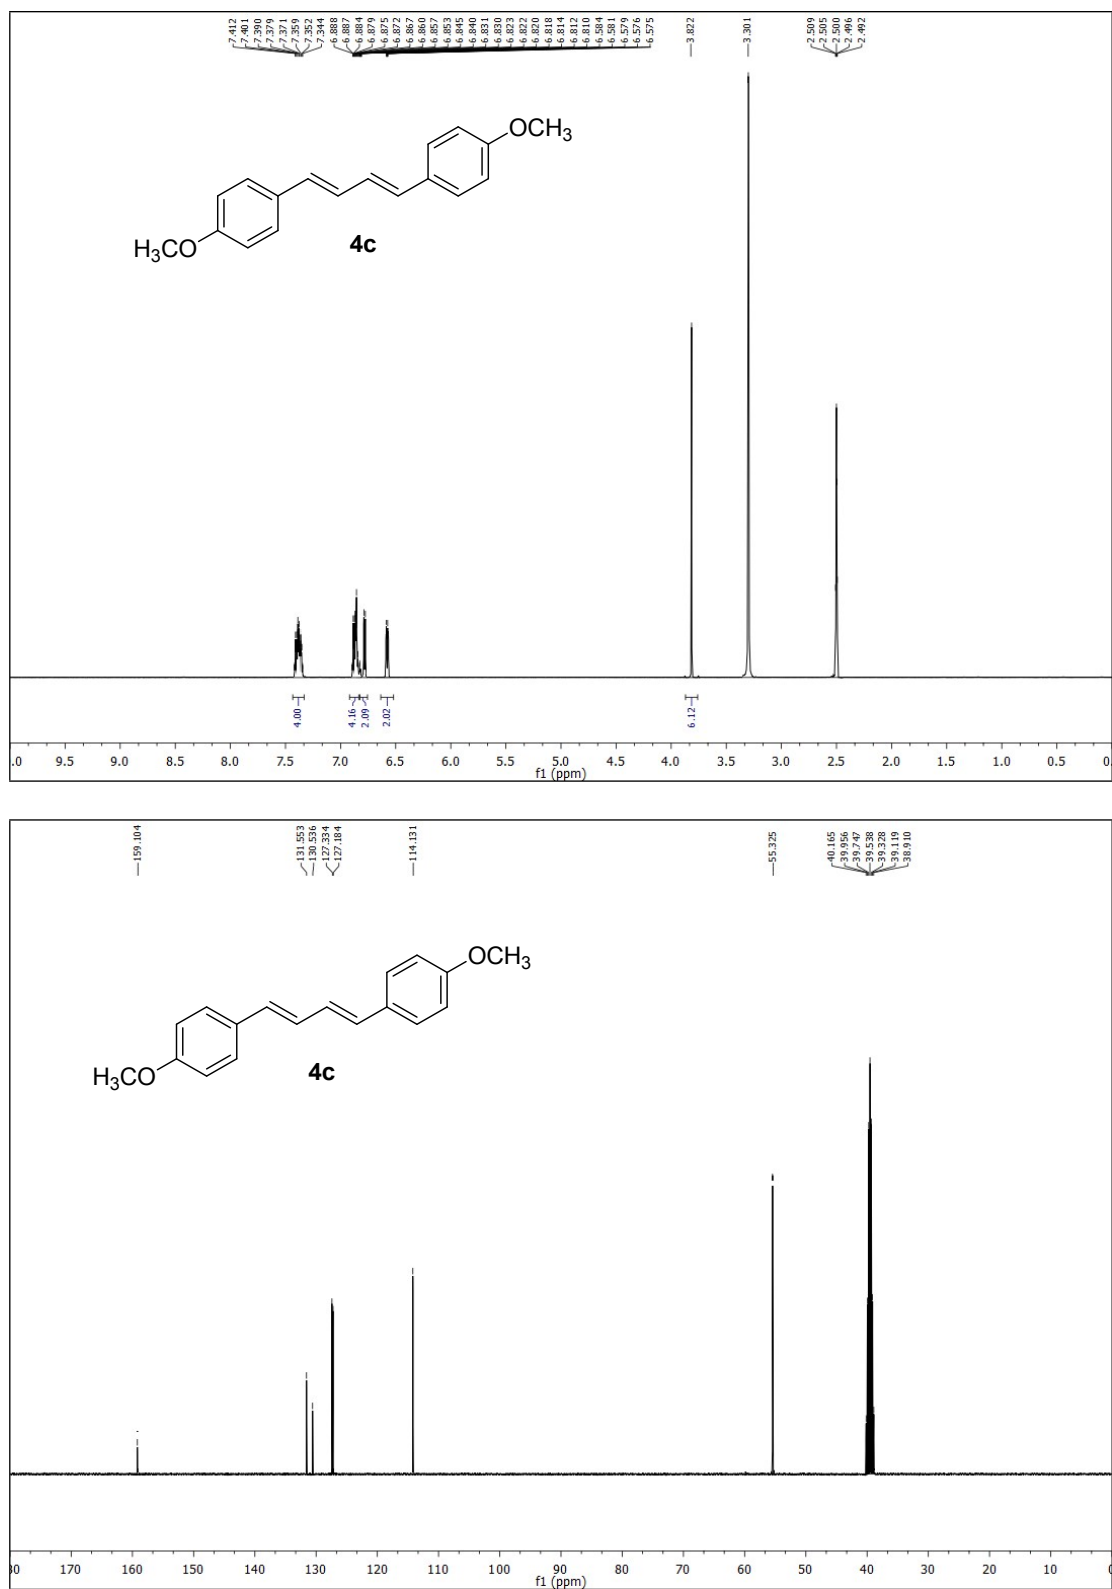

**Figure S15.** <sup>1</sup>H (top, 300 MHz) and <sup>13</sup>C (bottom, 75 MHz) NMR spectra of **4c** in DMSO-d<sub>6</sub>.

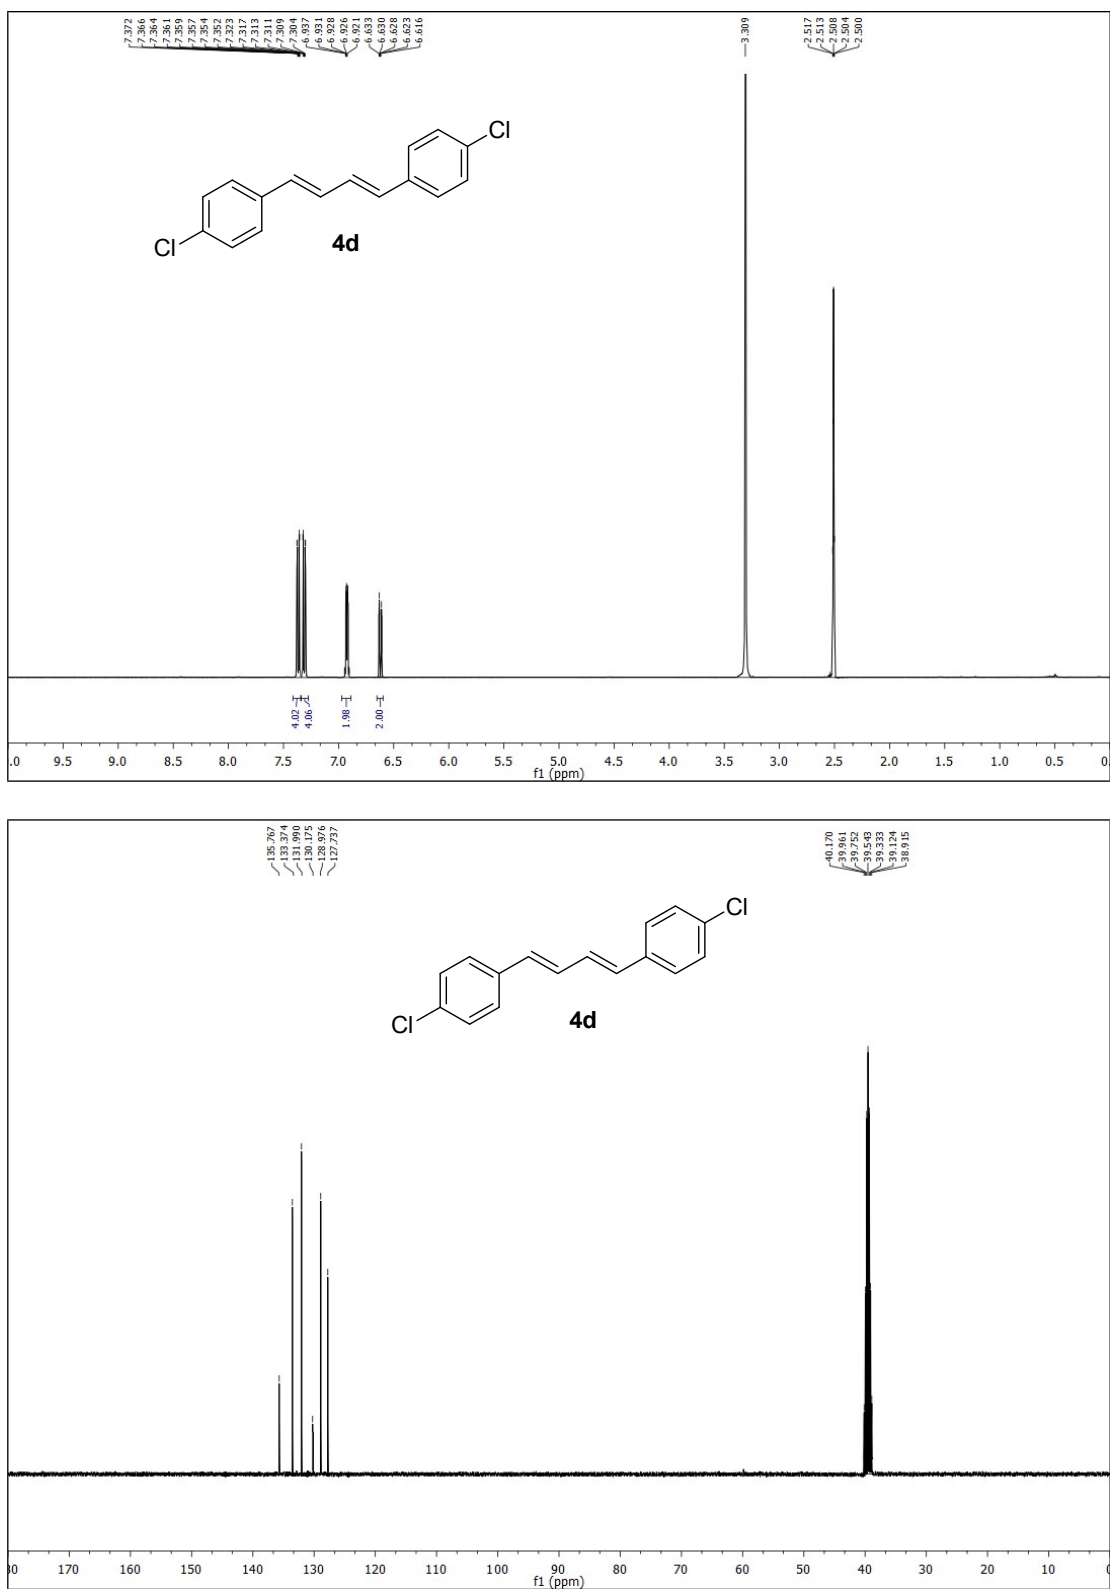

**Figure S16.**  $^1\text{H}$  (top, 300 MHz) and  $^{13}\text{C}$  (bottom, 75 MHz) NMR spectra of **4d** in DMSO- $d_6$ .

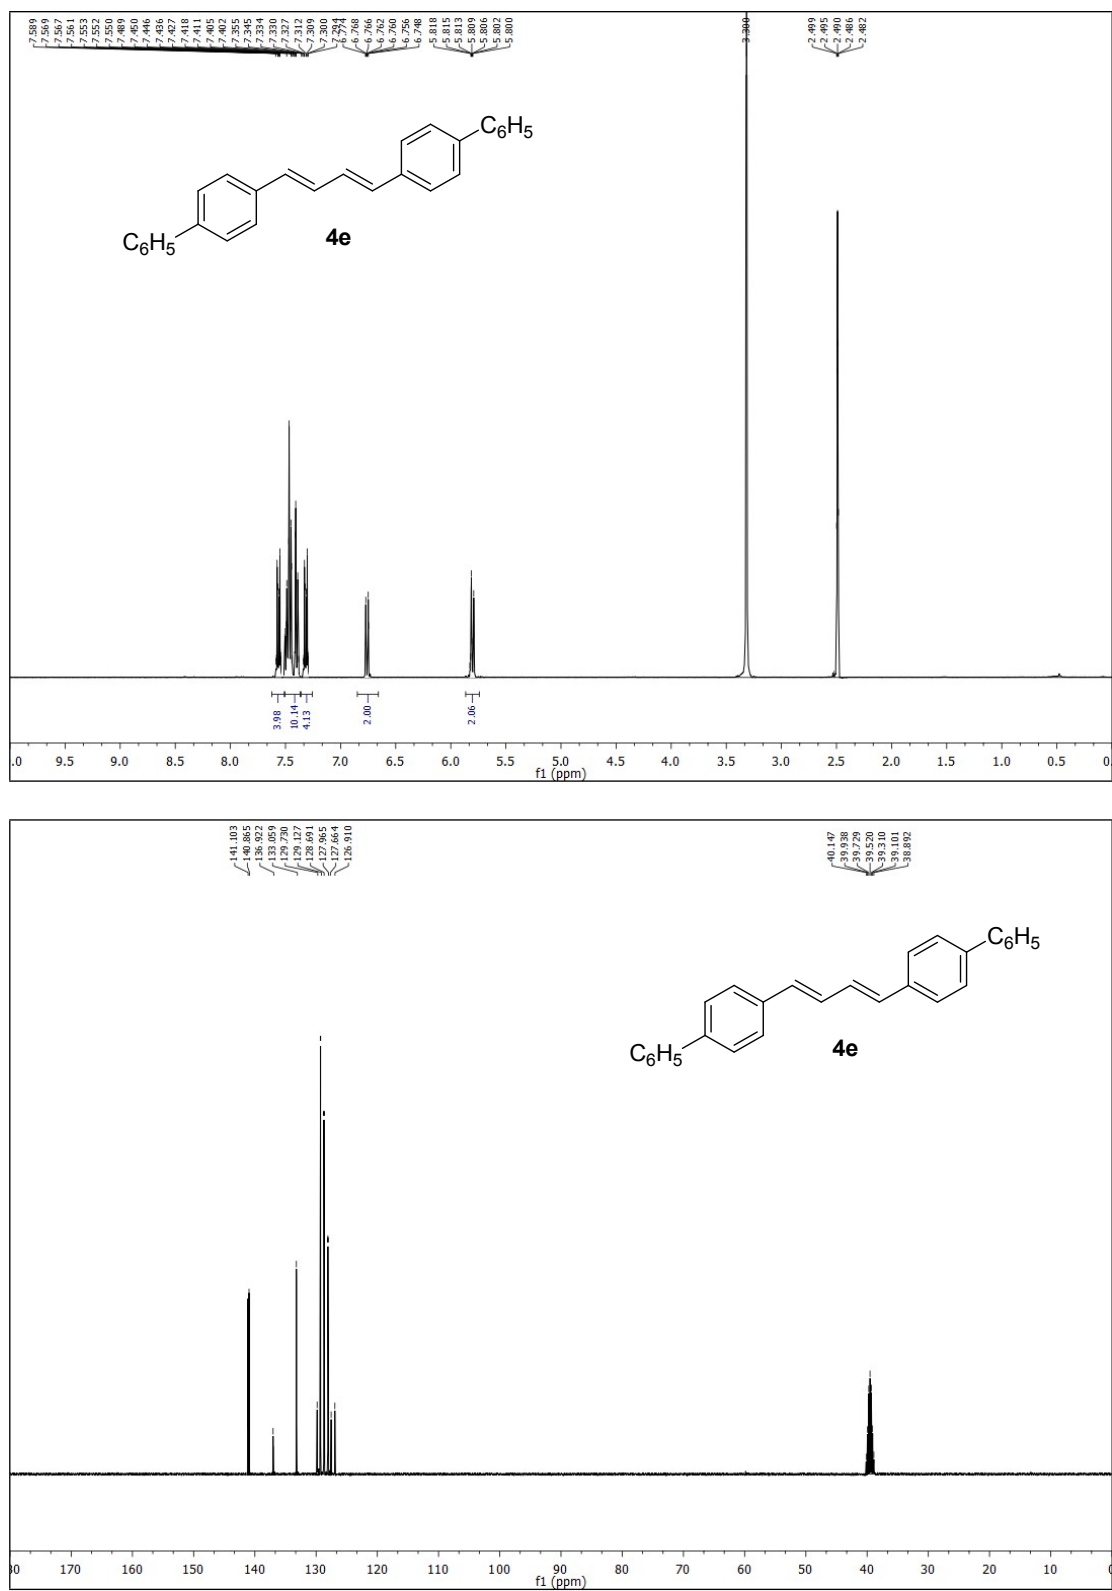

Figure S17. <sup>1</sup>H (top, 300 MHz) and <sup>13</sup>C (bottom, 75 MHz) NMR spectra of **4e** in DMSO-d<sub>6</sub>.





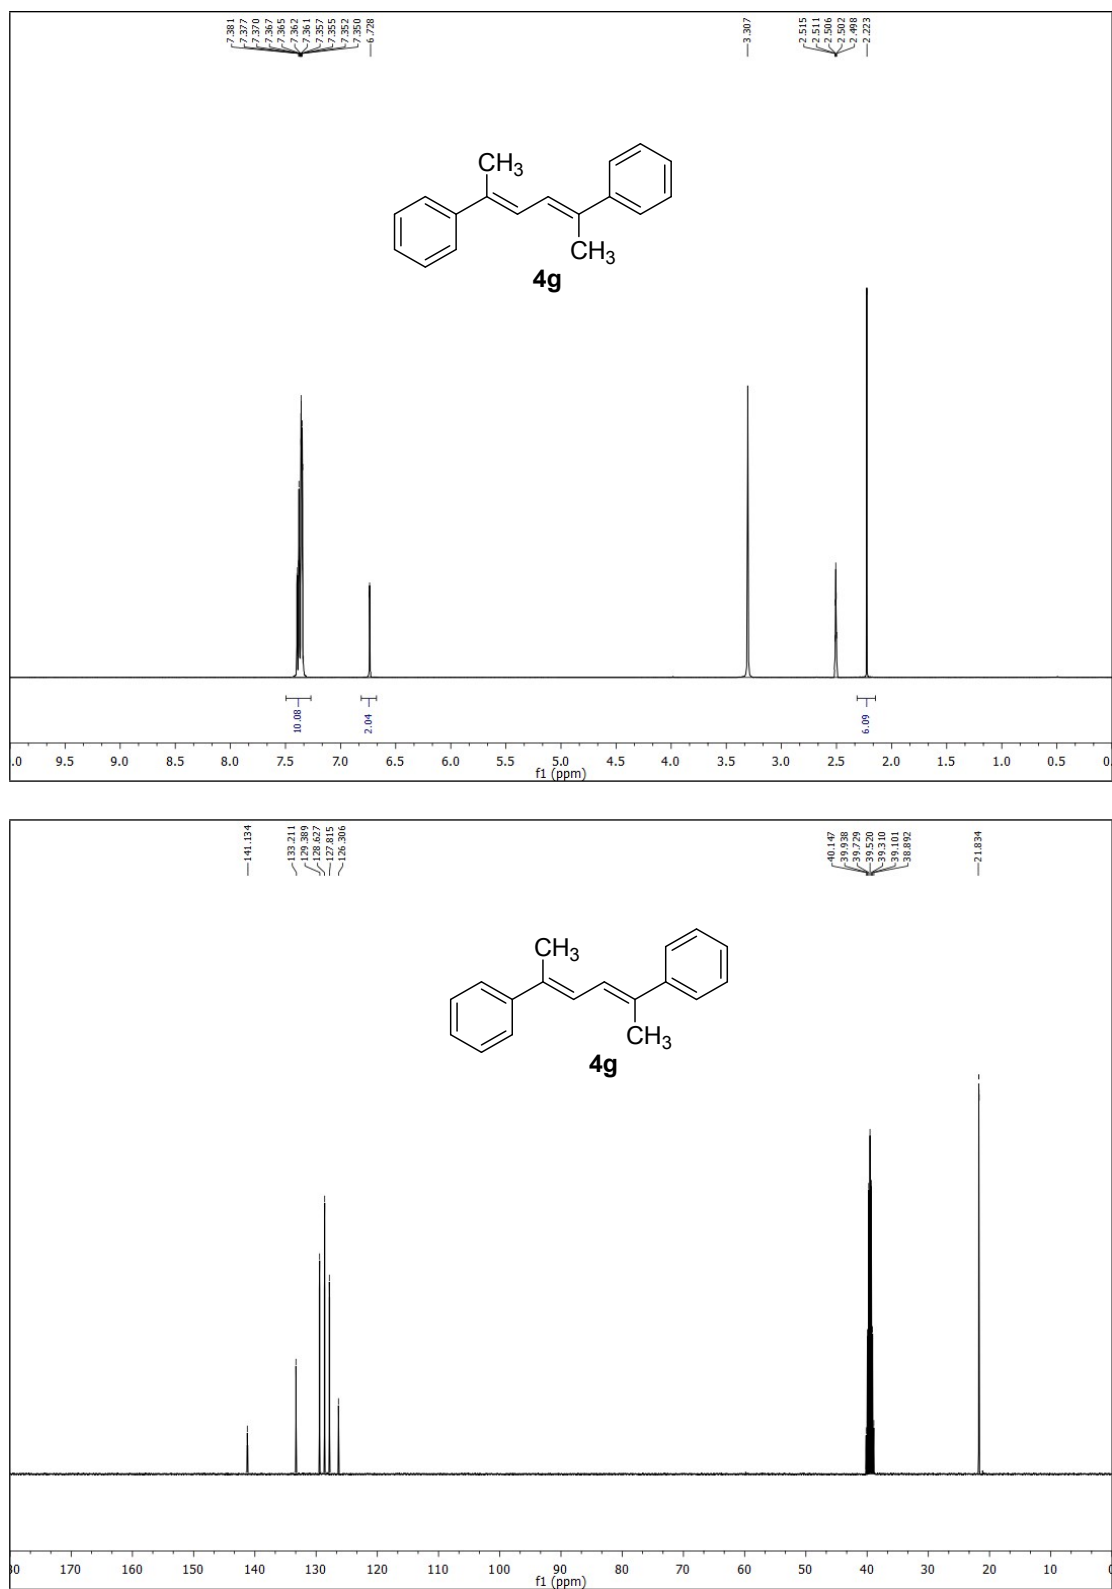

**Figure S19.** <sup>1</sup>H (top, 300 MHz) and <sup>13</sup>C (bottom, 75 MHz) NMR spectra of **4g** in DMSO-d<sub>6</sub>.

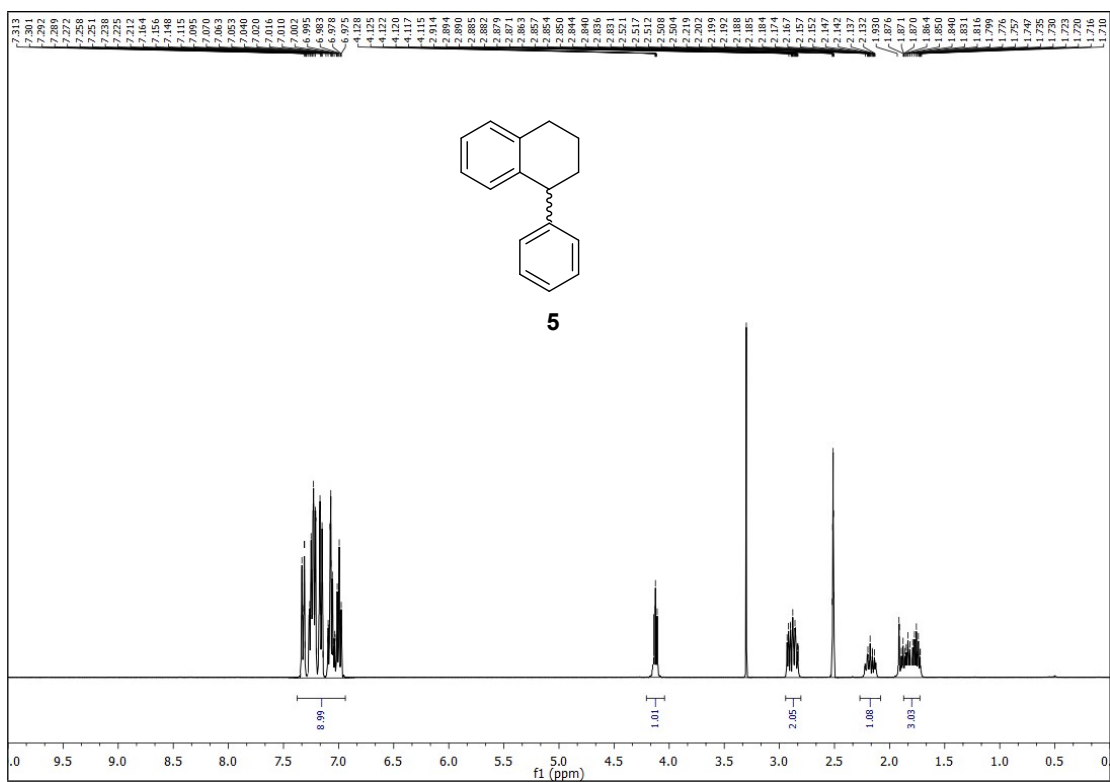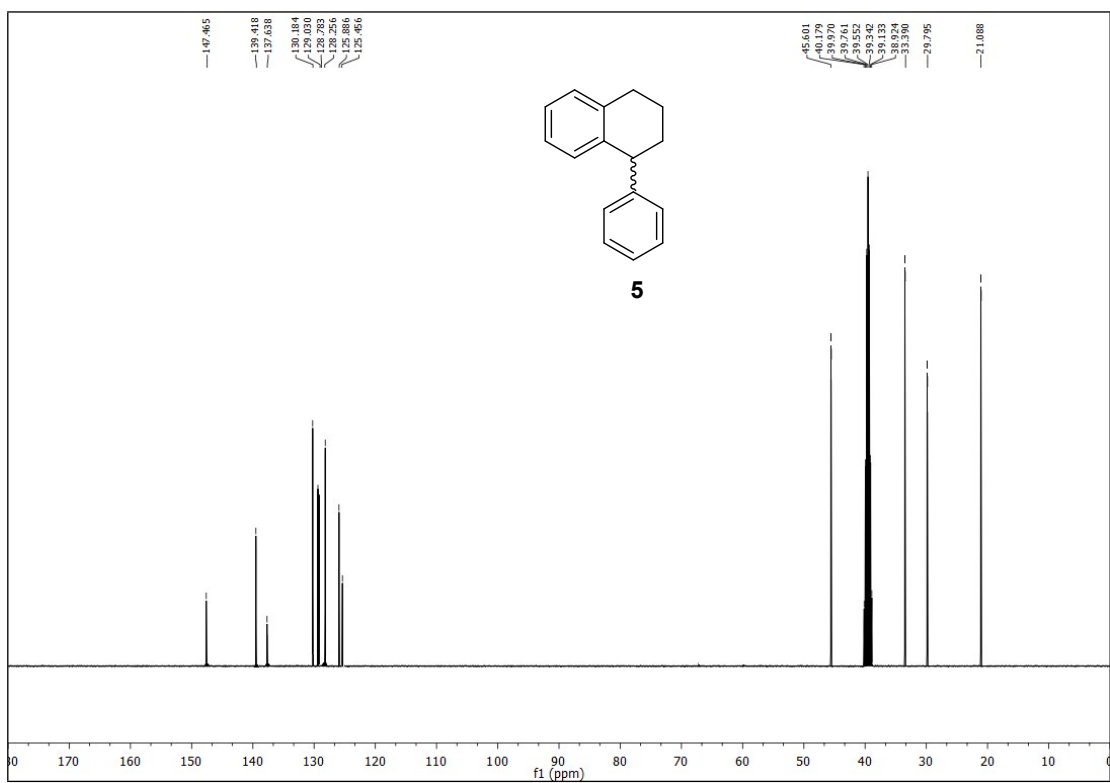

Figure S20. <sup>1</sup>H (top, 300 MHz) and <sup>13</sup>C (bottom, 75 MHz) NMR spectra of **5** in DMSO-d<sub>6</sub>.
